1 **Title**

2 A Division of Labor in the Recruitment and Topological Organization of a Bacterial  
3 Morphogenic Complex

4  
5 **Authors**

6 Paul D. Caccamo<sup>1,2</sup>, Maxime Jacq<sup>1,3</sup>, Michael S. VanNieuwenhze<sup>4,5</sup> and Yves V.  
7 Brun<sup>1,3,\*</sup>

8  
9 <sup>1</sup>Department of Biology, Indiana University, 1001 E. 3rd St, Bloomington, IN 47405,  
10 USA

11 <sup>2</sup>School of Life Sciences, Biodesign Center for Mechanisms of Evolution, Arizona State  
12 University, Tempe, Arizona, USA

13 <sup>3</sup>Département de Microbiologie, Infectiologie et Immunologie, Université de Montréal,  
14 Pavillon Roger-Gaudry, C.P. 6128, Succursale Centreville, Montréal, Canada

15 <sup>4</sup>Department of Molecular and Cellular Biochemistry, 212 S. Hawthorne Drive, Indiana  
16 University, Bloomington, IN 47405, USA

17 <sup>5</sup>Department of Chemistry, Indiana University, 800 East Kirkwood Avenue, Bloomington,  
18 IN 47405, USA

19  
20 \*Correspondence: [yves.brun@umontreal.ca](mailto:yves.brun@umontreal.ca) (Y.V.B.)

21 Lead Contact: [yves.brun@umontreal.ca](mailto:yves.brun@umontreal.ca) (Y.V.B.)

22  
23 **Summary**

24 Bacteria come in an array of shapes and sizes, but the mechanisms underlying diverse  
25 morphologies are poorly understood. The peptidoglycan (PG) cell wall is the primary  
26 determinant of cell shape. At the molecular level, morphological variation often results  
27 from the regulation of enzymes involved in cell elongation and division. These enzymes  
28 are spatially controlled by cytoskeletal scaffolding proteins, that both recruit and  
29 organize the PG synthesis complex. How then do cells define alternative morphogenic  
30 processes that are distinct from cell elongation and division? To address this, we have  
31 turned to the specific morphotype of Alphaproteobacterial stalks. Stalk synthesis is a  
32 specialized form of zonal growth, which requires PG synthesis in a spatially constrained

33 zone to extend a thin cylindrical projection of the cell envelope. The morphogen SpmX  
34 defines the site of stalk PG synthesis, but SpmX is a PG hydrolase. How then does a  
35 non-cytoskeletal protein, SpmX, define and constrain PG synthesis to form stalks? Here  
36 we report that SpmX and the bactofilin BacA act in concert to regulate stalk synthesis in  
37 *Asticcacaulis biprosthecum*. We show that SpmX recruits BacA to the site of stalk  
38 synthesis. BacA then serves as a stalk-specific topological organizer for PG synthesis  
39 activity, including its recruiter SpmX, at the base of the stalk. In the absence of BacA,  
40 cells produce "pseudostalks" that are the result of unconstrained PG synthesis.  
41 Therefore, the protein responsible for recruitment of a morphogenic PG remodeling  
42 complex, SpmX, is distinct from the protein that topologically organizes the complex,  
43 BacA.

44

## 45 **Introduction**

46 Bacterial cells come in a panoply of shapes and sizes, from the ubiquitous rods and  
47 cocci to hyphal, star-shaped, and appendaged bacteria [1]. In addition to shapes that  
48 are reproduced faithfully across generations, bacterial cells can dynamically change  
49 shape in response to environmental conditions or through a programmed life cycle [1-3].  
50 The shape of most bacteria is determined by the peptidoglycan (PG) cell wall, and the  
51 resulting morphology is the product of complex interactions between the proteins and  
52 regulatory elements that compose the PG biosynthetic machinery. Much morphological  
53 variation results from the differential regulation of divisome or elongasome proteins. For  
54 example, the suppression of divisome proteins allows ovococoid bacteria to form rods  
55 under certain biofilm conditions or pathogenic rod-shaped bacteria to filament during  
56 infection [3-6]. Filamentous Streptomyces form branching hyphae by localizing the  
57 same elongation machinery in different places [3, 7]. How then do cells define a new  
58 morphological process that is distinct from the elongasome or divisome, but still  
59 operates in the context of those critical PG synthesis modes? To address this question,  
60 we have turned to the specific morphotype of Alphaproteobacterial prosthecae.  
61 Prosthecae, or "stalks", are non-essential extensions of the bacterial cell body thought  
62 to play a role in nutrient uptake [8, 9]. Stalk synthesis requires PG synthesis in a  
63 spatially constrained zone in order to extend a thin cylindrical projection of the cell  
64 envelope. The stalk is compartmentalized from the cytoplasm, as it is devoid of DNA  
65 and ribosomes and excludes even small cytoplasmic proteins such as GFP [9].  
66 *Asticcacaulis biprosthecum*, a gram negative Alphaproteobacterium from the  
67 Caulobacteraceae family [10], produces two bilateral stalks whose synthesis depends  
68 on PG synthesis at the base of the incipient stalk structures (red arrows in Figure 1A)

69 [11]. How do cells harness PG synthesis machinery to produce stalks while preventing  
70 its typical function of cell elongation or division?

71 Here we report how a recently identified class of bacterial cytoskeletal protein, known as  
72 "bactofilin" (BacA), plays a dual role by defining the topography of PG synthesis for the  
73 synthesis of stalks and by inhibiting a default cell elongation mode at that same site in  
74 *A. biprosthecum*. Bactofilins are conserved throughout the bacterial kingdom and are  
75 characterized by the presence of a central conserved DUF583 (or "bactofilin") domain  
76 flanked by N- and C-terminal regions of variable length and sequence (Figure 1B) [12].  
77 Bactofilins are involved in cell shape determination in a number of species. For  
78 example, in the helical *Helicobacter pylori* and *Leptospira biflexa*, bactofilins are  
79 required for proper helical shape generation [13, 14]. In *Caulobacter crescentus*,  
80 bactofilins optimize the rate of stalk synthesis at the cell pole by a yet unknown  
81 mechanism [12]. A bactofilin mutant of *C. crescentus* still synthesizes stalks normally in  
82 a complex medium and exhibits a 50% reduction in stalk length under phosphate  
83 starvation where stalk elongation is strongly stimulated. While bactofilin recruits PbpC,  
84 whose mutant leads to a similar modest reduction in stalk length, a bactofilin mutant still  
85 exhibits strong PG synthesis activity similar to wild-type cells, indicating that *C.*  
86 *crescentus* bactofilin is not required for stalk PG synthesis. Therefore, it is not well  
87 understood how bactofilins exert an effect on morphology, but a common theme  
88 appears to be association or direct interaction with PG modifying enzymes.

89 The best studied bacterial cytoskeletal proteins (MreB, FtsZ, and DivIVA) serve dual  
90 roles as both recruiters and organizers of the proteins for their respective PG synthesis  
91 complexes. In contrast, we show that the roles of recruiter and organizer of PG

92 synthesis have undergone a division of labor in *A. biprosthecum* stalk synthesis, where  
93 a morphogen, SpmX, recruits its own organizing cytoskeletal protein, BacA. Our prior  
94 work established that the recruitment of the stalk PG synthesis machinery is performed  
95 by the modular morphogen SpmX: changing SpmX location is sufficient to drive stalk  
96 synthesis at a new site [11], much like changing the position of FtsZ changes the  
97 location of the site of cell division. However, SpmX is a PG hydrolase, not a cytoskeletal  
98 protein [11, 15]. How then does a non-cytoskeletal protein, SpmX, define and constrain  
99 PG synthesis to form stalks? In this work, we identify BacA as a cytoskeletal scaffolding  
100 protein that provides topological specificity to stalk PG synthesis in *A. biprosthecum*,  
101 including to the recruiter SpmX itself. We apply genetics, cell biology, microscopy,  
102 chemical labeling, and quantitative analysis to examine the interconnected roles of the  
103 morphogen SpmX and the bactofilin BacA in *A. biprosthecum* stalk synthesis. We  
104 present evidence that SpmX and BacA act in a coordinated fashion to initiate and  
105 regulate stalk synthesis. SpmX acts as the recruiter of the stalk synthesis complex,  
106 including BacA. BacA then serves as a stalk-specific cytoskeletal scaffolding protein  
107 that anchors the putative synthesis complex, including SpmX, to the base of the stalk,  
108 and defines the width of the complex. In the absence of BacA, cells produce abnormal  
109 "pseudostalks" that are the result of unconstrained PG synthesis correlated with the  
110 mislocalization of SpmX. Finally, we show that BacA is required to block PG synthesis  
111 involved in cell elongation and division, as well as DNA, from the site of stalk synthesis  
112 defined by SpmX. Therefore, the protein responsible for recruitment of a morphogenic  
113 PG remodeling complex, SpmX, is different than the protein that topologically organizes  
114 the complex, BacA. Such separation of the recruitment and scaffolding activities in two

115 different proteins may prove more versatile for morphogenetic events that do not simply  
116 involve modulation of cell elongation or division.  
117

## 118 **Results**

### 119 ***A. biprosthicum* encodes a single bactofilin gene whose product self-** 120 **polymerizes *in vitro***

121 *A. biprosthicum* has proven to be a better system than *C. crescentus* to identify genes  
122 required for stalk synthesis because: 1) with the exception of a *C. crescentus* MreB-  
123 mCherry sandwich fusion that acts through an unknown mechanism to block stalk  
124 synthesis [16], the *A. biprosthicum* *spmX* mutant is the only known stalkless mutant in  
125 any Caulobacterales species whose phenotype is not bypassed by phosphate  
126 starvation [11, 17, 18], which stimulates stalk synthesis [11, 19-21]; 2) *A. biprosthicum*  
127 stalks are located at midcell, away from the myriad of polarly localized proteins involved  
128 in *C. crescentus* development and cell cycle progression [22-25], eliminating any  
129 potentially confounding co-localization or interaction data; and 3) many of the genetic  
130 tools developed for *C. crescentus* work in *A. biprosthicum*. In *C. crescentus*, deletion of  
131 the bactofilin genes *bacA* and *bacB* (for clarity, these will be referred to as "*bacA<sub>cc</sub>*" and  
132 "*bacB<sub>cc</sub>*") leads to a slight reduction in the length of otherwise normal stalks [12, 26, 27].  
133 Only one bactofilin homolog was found in the *A. biprosthicum* genome, which we have  
134 named "*bacA*" due to its bidirectional best hit in *C. crescentus* being *bacA<sub>cc</sub>* (Figure 1C).  
135 The genomic arrangement of the *A. biprosthicum* *bacA* locus is similar to that of *C.*  
136 *crescentus* *bacA<sub>cc</sub>*, with a putative M23 family metallopeptidase gene  
137 (CC1872/ABI\_34190) directly upstream and overlapping the *bacA<sub>cc</sub>/bacA* coding  
138 regions, and a putative peroxiredoxin gene (CC1871/ABI\_34200) further upstream  
139 (Figure 1C). Downstream of and convergent to *bacA* lies a hypothetical gene (Figure  
140 1C). BacA exhibits high sequence and predicted structural similarity to the *C. crescentus*  
141 bactofilins, with a central DUF583 domain composed of repeating  $\beta$  strands flanked by  
142 proline-rich N- and C-termini, suggesting similar biochemical properties (Figure 1D).

143 Indeed, BacA<sub>Cc</sub> can self-assemble *in vitro* into filaments, filament bundles, and sheets  
144 [12, 28]. To test if *A. biprosthicum* BacA is a self-polymerizing protein, we  
145 overexpressed and purified both BacA<sub>Cc</sub> and BacA in *Escherichia coli* and visualized the  
146 purified proteins via transmission electron microscopy (TEM) (Figure 1E). While BacA<sub>Cc</sub>  
147 readily polymerized in various environments (salt, pH, chaotropic agent), under similar  
148 conditions BacA formed proteins aggregates instead of filaments. While most conditions  
149 tested did not improve BacA solubility, addition of high detergent concentration (10%  
150 Triton X-100) allowed filament formation. The TEM micrographs show that both  
151 bactofilin proteins, BacA<sub>Cc</sub> and BacA, self-polymerize *in vitro* to form protofilament  
152 bundles, with BacA forming ~90 nm wide filaments (Figure 1E; red arrows indicate BacA  
153 protofilaments).

#### 154 **BacA is required for stalk synthesis**

155 In *C. crescentus*, deletion of the bactofilin homologs *bacA<sub>Cc</sub>* and/or *bacB<sub>Cc</sub>* does not  
156 abrogate stalk synthesis or impact stalk ultrastructure, but results in a slight reduction in  
157 stalk length under stalk synthesis-stimulating, phosphate-limited conditions, and does  
158 not impact the strong PG synthesis activity at the base of the stalk [12]. This suggests  
159 that, in *C. crescentus*, deletion of *bacAB<sub>Cc</sub>* affects only stalk longitudinal extension and  
160 to a limited extent [12]. Strikingly, ~95% of *A. biprosthicum*  $\Delta$ *bacA* mutant cells were  
161 completely stalkless when grown in the rich medium PYE (see culturing details in  
162 **Experimental Model and Subject Details**), with a small proportion of cells exhibiting  
163 bump-like protrusions at the midcell where stalks would normally be found (Figure S1A).  
164 Since growth in rich medium may mask latent stalk phenotypes [11, 21], the  $\Delta$ *bacA*  
165 mutant was studied under phosphate starvation, which stimulates stalk synthesis [11,  
166 19-21].



167 In low phosphate medium, more than half ( $58\% \pm 12\%$ ) of WT cells possessed a visible  
168 cell body extension, all of which were stalks (Figure 2). In the  $\Delta bacA$  mutant, only  $3\% \pm$   
169  $2\%$  of total cells produced a stalk (Figure 2). Instead of synthesizing wildtype stalks, the  
170  $\Delta bacA$  mutant produced short, wide protrusions at the bilateral positions where stalks  
171 are normally synthesized, which we have termed “pseudostalks” (Figure 2A and red  
172 arrows in Figure 2B). Under phosphate starvation, the stalks produced by WT cells were  
173  $7.3 \pm 3.7 \mu\text{m}$  long and  $171 \pm 13 \text{ nm}$  in diameter at the base (Figure 2). Pseudostalks  
174 were significantly shorter than stalks at  $0.9 \pm 0.5 \mu\text{m}$  long (~88% decrease in length  
175 compared to WT), were more variable in diameter, and were often branched or  
176 “frazzled” at the ends (Figure 2). Pseudostalks were significantly wider in diameter at  
177 the base,  $392 \pm 73 \text{ nm}$  or an ~129% increase in width compared to WT (Figure 2).

178 The presence of a low-copy plasmid encoding *bacA* expressed from its native promoter  
179 restored stalk diameter to WT levels ( $178 \pm 20 \text{ nm}$  vs.  $171 \pm 13 \text{ nm}$ , respectively),  
180 suggesting that BacA plays a key role in determining and maintaining stalk width (Figure  
181 2). In addition,  $28\% \pm 6\%$  of complemented  $\Delta bacA$  cells produced WT-like stalks, a 10-  
182 fold increase over the mutant (Figure 2). Complemented  $\Delta bacA$  cells produced stalks  
183  $2.4 \pm 2.0 \mu\text{m}$  long that, while shorter than WT stalks, were significantly longer than  
184  $\Delta bacA$  pseudostalks (Figure 2). It is unlikely that the less efficient complementation of  
185 stalk number and length are due to polarity effects of the mutation since the gene  
186 downstream of *bacA* is transcribed in the opposite direction (Figure 1C). Dosage effects  
187 may explain why complementation is not fully achieved for these phenotypes; however,  
188 we are unable to test this at this time due to a lack of BacA antibodies. Taken together,  
189 these data show that BacA is required for stalk synthesis in *A. biprosthicum*.

## 190 **BacA localizes to the site of stalk synthesis after SpmX localization**

191 While the localization of SpmX is known, the pattern of BacA localization is not. The  
192 stalk morphogen SpmX localizes to the future site of stalk synthesis in predivisional  
193 cells of *Asticcacaulis*, where it marks the site of stalk synthesis, which occurs after cell  
194 division and swarmer cell differentiation in the next cell cycle (Figure 1A) [11]. To  
195 investigate the subcellular localization of BacA in WT cells, we fused BacA to mVenus  
196 at the native locus and performed fluorescence microscopy. This fusion is functional,  
197 and cells expressing BacA-mVenus produced normal stalks at a similar frequency as  
198 WT cells expressing the native protein (Figure S1).

199 We first performed time-lapse fluorescence microscopy to determine the timing of BacA  
200 localization during the cell cycle (Figure 3A and Videos S1 & S2). The first four panels  
201 of Figure 3A (0-84 min) show the elongation of a predivisional mother cell as it produces  
202 an incipient swarmer daughter cell, where BacA is already localized at bilateral positions  
203 in the stalked half of the cell. In contrast to SpmX, which localizes before cell division at  
204 the future sites of stalk synthesis, we were unable to detect new BacA foci in  
205 predivisional cells. After cell division (the transition from 84-112 min), a BacA-mVenus  
206 focus appeared at a lateral position in the incipient swarmer cell. While only one BacA-  
207 mVenus focus is visible in the overlay from 112 to 140 min, a second focus is clearly  
208 visible in the overlay at 168 and 196 min. This process of BacA localization after cell  
209 division is repeated in later panels with a second daughter cell (196-252 min).

210 Therefore, SpmX localizes before cell division (Figure 4A), whereas BacA localizes after  
211 cell division, significantly after SpmX (Figure 3C). We then sought to quantify BacA-  
212 mVenus localization at the population level, rather than single cells. Overall, BacA-  
213 mVenus localized to bilateral positions at the base of the stalks (Figure 3D). A

214 population-level heatmap of the subcellular localization of BacA-mVenus foci exhibited a  
215 localization pattern similar to that of SpmX (Figure 4D) [11], with foci clustering in a  
216 bilateral manner at the midcell (Figure 3E).

### 217 **SpmX is required for BacA localization**

218 Considering that 1) both SpmX and BacA are required for WT stalk synthesis; 2) that  
219 both proteins localize to the site of stalk synthesis; and 3) that SpmX localizes to the site  
220 of stalk synthesis prior to BacA, we hypothesized that SpmX is required for BacA  
221 localization. In order to test the role of SpmX in BacA localization, we constructed a  
222 strain with a *bacA-mVenus* fusion at the native locus in the  $\Delta$ *spmX* background.

223 As reported above in the WT background, BacA-mVenus localized to the base of the  
224 stalk (Figure 3D, top) with foci clustering in a bilateral manner at the midcell (Figure 3E,  
225 top). In the  $\Delta$ *spmX* mutant, BacA-mVenus was often mislocalized toward the poles  
226 (Figure 3D, bottom), and the population-level heatmap of the subcellular localization of  
227 BacA-mVenus foci in the  $\Delta$ *spmX* mutant showed that BacA-mVenus was randomly  
228 distributed throughout the cell body (Figure 3E, bottom). However, these images  
229 represent only a snapshot of BacA-mVenus localization at a single time point. To further  
230 investigate BacA-mVenus dynamics in WT and  $\Delta$ *spmX* strains, we performed time-  
231 lapse fluorescence microscopy (Figures 3A & 3B and Videos S1-S4) and used particle  
232 tracking to follow movement and velocity changes for individual foci (Figures 3F & 3G).  
233 In WT cells, BacA-mVenus foci were constrained bilaterally at sites of stalk synthesis  
234 and remained relatively static once they appeared (Figures 3A, 3F, & 3G and Videos S1  
235 & S2). Conversely, in the  $\Delta$ *spmX* mutant, BacA-mVenus foci moved randomly  
236 throughout the cell body and exhibited start-stop patterns of spikes and drops in velocity

237 (Figures 3B, 3F, & 3G and Videos S3 & S4). Taken together, these data show that  
238 SpmX is required for BacA localization.

### 239 **BacA is required to constrain SpmX at the base of the stalk**

240 Cytoskeletal scaffolding proteins can be loosely defined as proteins that physically  
241 organize the molecular components of a biological process or pathway [3]. Because 1)  
242 SpmX acts in a modular fashion to define the site of stalk synthesis [11]; 2) SpmX is  
243 required for BacA localization; and 3) BacA is required to constrain stalk diameter, we  
244 hypothesized that BacA organizes PG synthesis enzymes, and perhaps SpmX, at the  
245 site of stalk synthesis. To test SpmX localization in the absence of BacA, we  
246 constructed strains with a *spmX-eGFP* fusion at the native locus in both WT and  $\Delta bacA$   
247 backgrounds.

248 Consistent with previously published results [11], fluorescence microscopy showed that  
249 SpmX-eGFP first appears in the incipient swarmer compartment of predivisional cells of  
250 *A. biprosthecum* where it localizes bilaterally to mark the site of stalk synthesis, which  
251 occurs after cell division and swarmer cell differentiation [11] (Figures 1A, 4A, 4C, & 4D  
252 and Video S5). Interestingly, SpmX localized to the future bilateral site of stalk synthesis  
253 even in the absence of BacA (Figures 4B-4D and Video S6). However, in the  $\Delta bacA$   
254 mutant SpmX-eGFP often localized to the tips of pseudostalks rather than the base of  
255 stalks as it does in WT cells (Figure 4C). When stalk synthesis was restored in the  
256  $\Delta bacA$  mutant by the expression of BacA from a plasmid, SpmX localization to the base  
257 of the stalk was restored as well (Figure 4C). This defect of SpmX localization is further  
258 revealed by the localization heatmaps, where, rather than a tight localization close to  
259 the cell envelope in WT, there is a diffuse localization at the midcell that radiates away

260 from the cell body in the  $\Delta bacA$  mutant (Figure 4D). Indeed, quantification of the  
261 orthogonal distance of SpmX-eGFP maxima from the medial axis of the associated cell,  
262 showed a significant increase in  $\Delta bacA$  cells compared to WT, a defect that was  
263 rescued in the complementation strain (Figure 4E). It should be noted that when stalk  
264 synthesis is restored by exogenous expression of BacA, SpmX localization to the base  
265 of the stalk is also restored in these cells (Figure S2). While global SpmX protein levels  
266 according to Western blot are similar between WT and  $\Delta bacA$  strains (Figure S3), the  
267 area of the SpmX-eGFP maxima significantly increased in the  $\Delta bacA$  mutant compared  
268 to WT, a defect that was restored in the complementation strain (Figure 4F). This  
269 suggests that BacA may play a role in regulating the number of SpmX molecules that  
270 comprise the stalk synthesis complex. These results indicate a scaffolding role for BacA  
271 during stalk synthesis whereby BacA is required to constrain SpmX in a tight area at the  
272 base of the stalk. The above results suggest that SpmX acts upstream of BacA, which  
273 was confirmed by the  $\Delta spmX \Delta bacA$  double mutant, which phenocopied  $\Delta spmX$  (Figure  
274 4G).

### 275 **BacA and SpmX colocalize *in vivo* and interact in a bacterial two-hybrid system**

276 Since SpmX is required for BacA localization (Figure 3) and BacA is required to  
277 constrain SpmX at the base of the stalk (Figure 4), we wondered whether this could be  
278 due to a direct interaction between the two proteins. To address this, we first  
279 simultaneously expressed SpmX-mCherry and BacA-mVenus fusions in *A.*  
280 *biprosthecum*. Cells produced stalks, indicating that the fusions are functional when  
281 expressed together. Both BacA-mVenus and SpmX-mCherry formed foci at the midcell  
282 that often overlapped (Figure 5A), and there was a positive correlation between the  
283 localization of the two fusion proteins (Pearson's Correlation Coefficient =  $0.48 \pm 0.23$ ; n

284 = 179). We note that in many cases, one of the co-localized BacA focus was much  
285 weaker than the other, with some cells having only detectable co-localized BacA with  
286 one of the two SpmX foci. This may be an indication that relatively few molecules of  
287 BacA are required to constrain SpmX at the base of stalks or that the BacA-SpmX  
288 interaction is transitory and becomes less important as the stalk synthesis matures.

289 We then asked whether SpmX and BacA interact *in vivo* using bacterial adenylate  
290 cyclase two-hybrid (BACTH) assays [29]. We tested all combinations of T18 and T25  
291 fusions for SpmX and BacA (Figure 5B-5E). Serving as an internal control, both SpmX  
292 and BacA showed self-interactions (Figure 5B-5E), consistent with previous results  
293 showing that *C. crescentus* SpmX forms oligomers [30] and confirming our results  
294 showing BacA is a self-polymerizing protein (Figure 1E). Notably, we also observed  
295 SpmX-BacA interactions (Figures 5D & 5E), although the only interactions we observed  
296 were when BacA was fused with the T25 fragment on the N-terminus (T25-BacA).

297 These results make sense in the context of recent work showing that the N-terminal tail  
298 of *Thermus thermophilus* bactofilin is required for membrane binding [31]. If the BacA N-  
299 terminal tail is also involved in membrane binding, the fact that we only detect SpmX-  
300 BacA interactions when the C-terminal tail is unencumbered by a fusion suggests that  
301 the C-terminal region of BacA is involved in protein-protein interactions with SpmX.

302 **Pseudostalks are composed of PG and formed through dispersed PG synthesis**  
303 *A. biprosthecum* stalks extend through the addition of newly synthesized PG at the base  
304 of the stalk and are composed of PG throughout [11]. Indeed, isolated PG sacculi  
305 maintain the shape of the bacterial cell, including PG-containing stalks [32]. To test if  
306 pseudostalks are composed of PG, we first isolated sacculi from *A. biprosthecum* WT

307 and  $\Delta bacA$  cells. As expected, *A. biprosthicum* WT sacculi exhibited long and thin  
308 bilateral extensions of stalk PG (Figure 6A). Sacculi purified from  $\Delta bacA$  cells showed  
309 sac-like bilateral extensions of PG that mimicked the morphology of pseudostalks  
310 (Figure 6A), confirming that pseudostalks are composed of PG.

311 There are several modes of PG synthesis that could result in pseudostalks. For  
312 example, they could be synthesized 1) from the base like WT stalks, albeit with a wider  
313 and variable area of extension; 2) via polar growth similar to vegetative growth of the  
314 filamentous Streptomyces [3], with PG remodeling occurring through polar tip  
315 extension; or 3) be the result of dispersed PG synthesis throughout the pseudostalk,  
316 similar to lateral elongation of some rod-shaped cells [3].

317 To test these possibilities, we employed various methods of Fluorescent D-Amino Acid  
318 (FDAA) [33] labeling to visualize active PG synthesis during growth in low-phosphate  
319 medium. Cells were first subjected to short labeling pulses (45 min or ~20% of doubling  
320 time) of a red FDAA (TADA) (Figure 6B). If pseudostalks are synthesized from the base,  
321 the FDAA should label the cell and stalk-to-cell body junction, but not the pseudostalk  
322 itself. In WT cells, labeling was diffuse throughout the cell, but absent from the stalks,  
323 except from the stalk-to-cell body junction where stalk PG is synthesized (Figure 6B),  
324 consistent with previous results [11]. In contrast,  $\Delta bacA$  cells showed strong labeling  
325 throughout the pseudostalks, indicating that these structures are not solely synthesized  
326 from the base as in WT stalks (Figure 6B). Because the labeling time was short relative  
327 to the time required for pseudostalk growth, we hypothesized that pseudostalk PG  
328 synthesis occurs through PG synthesis dispersed throughout the structure rather than  
329 by tip PG synthesis. To obtain better spatiotemporal resolution of PG remodeling and to

330 correlate SpmX localization with PG remodeling, we performed virtual time-lapse FDAA  
331 labeling, where short successive pulses of different colored FDAA probes are used for  
332 spatiotemporal labeling of areas of PG synthesis. *A. biprosthicum* WT SpmX-eGFP and  
333  $\Delta bacA$  SpmX-eGFP cells were first labeled with a blue FDAA (HADA) for 6 min followed  
334 by a red FDAA (TADA) for 3 min, with the dye being washed away after each respective  
335 incubation (Figure 6C). Cells were then imaged via 3D-SIM (Structured Illumination  
336 Microscopy). For WT cells, the HADA and TADA signals overlapped both in the cell  
337 body and at the base of the stalk, colocalized with the SpmX-eGFP focus and  
338 consistent with stalk PG synthesis at the base and no PG synthesis along the stalk  
339 length (Figure 6C). In contrast, the HADA and TADA signals overlapped in both the cell  
340 body and the pseudostalks of  $\Delta bacA$  cells and with SpmX-eGFP localizing to the tips of  
341 the pseudostalks (Figure 6C), indicating that pseudostalks are formed via dispersed PG  
342 synthesis throughout the structure.

343 **BacA inhibits the default elongation and division modes of PG synthesis as well**  
344 **as DNA entry at sites of stalk synthesis**

345 While the FDAA labeling techniques used above (Figures 6B & 6C) show that new PG  
346 is incorporated into the pseudostalk, it does not distinguish *per se* if PG is being  
347 incorporated from the base, as in WT stalks, or if PG incorporation is distributed  
348 throughout the pseudostalk. To determine the PG incorporation pattern for  $\Delta bacA$   
349 pseudostalks, we performed pulse-chase FDAA labeling (Figure 6D). *A. biprosthicum*  
350 WT and  $\Delta bacA$  cells were first labeled with a red FDAA (TADA) for ~12-14 hours (~3-  
351 3.5 cell cycles) to ensure whole-cell labeling, including stalks and pseudostalks. Cells  
352 were then washed twice to remove the FDAA and time-lapse fluorescent microscopy



353 was performed. In WT cells, stalks are synthesized from the base [11]. Once PG is  
354 added to the stalk, it is inert; that is, stalk PG is not diluted by the insertion of new  
355 material, nor removed by recycling. As the *A. biprosthicum* WT cells grew, FDAA signal  
356 disappeared from the cell body, but was retained in the stalk (Figure 6D), with a slight  
357 clearing near the base as stalk PG was synthesized from its base (Figure 6D, yellow  
358 triangles). In contrast,  $\Delta bacA$  cells lost FDAA signal throughout both the cell body and  
359 the pseudostalks at a similar rate (Figure 6D), consistent with PG synthesis throughout  
360 the pseudostalk (Figure 6B). Strikingly, 49% (42/85) of  $\Delta bacA$  cells observed were able  
361 to extend and divide from the pseudostalks and produced cell-like extensions that  
362 continued to elongate after cytokinesis (Figure 6E, yellow triangles), suggesting that cell  
363 growth was occurring at sites usually reserved for stalk synthesis. These results  
364 suggested that BacA might be required to prevent entry of chromosomal DNA that  
365 would be required for continued growth of these lateral cell extensions. To determine if  
366  $\Delta bacA$  pseudostalks contained DNA, we stained live cells with DAPI. In WT cells, DAPI  
367 staining was constrained to the cell body, but in  $\Delta bacA$  cells, pseudostalks stained  
368 strongly for DNA (Figure 6F). Stalks are normally compartmentalized from the  
369 cytoplasm [9], but in the absence of BacA, this appears to no longer be the case. It is  
370 unclear if BacA plays a direct role in excluding DNA from the stalk or if this is an indirect  
371 consequence of BacA organizing other stalk synthesis proteins at the base. It should be  
372 noted that we were unable to determine the viability of the cell-like structures produced  
373 from the pseudostalks, but, qualitatively, there is no discernable difference between the  
374 growth of WT and  $\Delta bacA$  strains in liquid culture or on plates. Taken together, these  
375 data indicate that, in addition to providing a scaffold for proper stalk PG synthesis at its

376 base, BacA inhibits not only unwanted PG synthesis involved in cell elongation and  
377 division, but also the entry of DNA at sites of stalk synthesis.

378

379 **Discussion**

380 Intricate biological processes underlie even the simplest of shapes. The ubiquitous rod-  
381 and sphere-shaped bacteria can be generated through multiple strategies [34, 35], but  
382 the final observed form is the result of finely tuned gene expression, metabolic  
383 processes that regulate PG precursor and subunit levels, and the spatiotemporal  
384 localization of PG-modifying enzymes. The study of shape generation and maintenance  
385 has uncovered a common theme of scaffolding proteins such as MreB, FtsZ, and  
386 DivIVA that organize morphogenic, PG remodeling processes. These cytoskeletal  
387 scaffolding proteins are 1) required for the recruitment of downstream enzymes and  
388 accessory proteins involved in cell wall remodeling and 2) control the spatial activity of  
389 these proteins. It should be noted that the PG remodeling processes are not necessarily  
390 discrete and must often be regulated in relation to each other. For instance, during a  
391 large portion of the cell cycle in *C. crescentus*, FtsZ serves as the most upstream  
392 localization factor for MreB, which is responsible for elongation and maintenance of cell  
393 width [36, 37].

394 Here we present evidence that the paradigm of a cytoskeletal scaffolding protein  
395 serving the dual roles of recruitment and organization in PG synthesis is not always  
396 true. In *A. biprosthicum*, the roles of recruitment and organization for the stalk synthesis  
397 PG remodeling complex are performed by two distinct proteins, SpmX and BacA,  
398 respectively. We propose a model in which SpmX recruits but does not organize and  
399 BacA organizes but does not recruit. Furthermore, BacA prevents cell elongation and  
400 division associated PG synthesis from being activated at the site of stalk PG synthesis.  
401 Finally, BacA also prevents the entry of DNA into stalks.

402 Previous work and this study show that SpmX appears early in *Asticcacaulis* spp. cell  
403 cycle, where it localizes in pre-divisional daughter cells to mark the future site of stalk  
404 synthesis ([11] and Figures 4A & 7A). Here we show that BacA operates downstream of  
405 SpmX for subcellular localization in the *A. biprosthecum* stalk synthesis pathway but  
406 acts upstream of SpmX for the topological organization of SpmX and the PG synthesis  
407 machinery. In the absence of SpmX, cells are stalkless ([11] and Figures 3A & 4G) and  
408 BacA-mVenus forms foci that move randomly throughout the cell body, indicating that  
409 SpmX recruits BacA, and presumably other PG remodeling enzymes that remain to be  
410 discovered, to the site of stalk synthesis (Figure 7B). In a  $\Delta bacA \Delta spmX$  double mutant,  
411 cells phenocopy the  $\Delta spmX$  mutant and fail to produce stalks or pseudostalks (Figure  
412 4G). This supports the conclusion that BacA operates downstream of SpmX. The SpmX  
413 muramidase domain has both PG binding and hydrolysis activity, indicating that it is in  
414 the periplasm [15], whereas BacA is cytoplasmic, making their interaction puzzling.  
415 However, results from a number of papers indicate that the *C. crescentus* SpmX  
416 muramidase domain spends at least some time in the cytoplasm, where it can interact  
417 with BacA [30, 38-40]. We hypothesize that the same is true for *A. biprosthecum*.  
418 Interestingly, once stalk synthesis is initiated, BacA serves as a scaffolding protein that  
419 constrains PG synthesis at the base of the stalk, allowing for WT stalk elongation and  
420 maturation (Figure 7B). Based on current knowledge, this is the first reported  
421 morphogenic PG remodeling process in which the protein responsible for recruitment of  
422 the complex is different from the scaffolding protein that organizes the complex. The  
423 stalkless phenotype of *spmX* and *bacA* mutants in *A. biprosthecum* is striking compared  
424 to *C. crescentus*, where neither gene is required for stalk synthesis. Deletion of *C.*

425 *crescentus* *bacA<sub>cc</sub>* does not impact stalk synthesis in the complex PYE medium and  
426 leads to a mild reduction of stalk length only under the strong stalk elongation  
427 stimulating conditions of phosphate starvation [12, 16]. In *A. excentricus*, which has a  
428 single sub-polar stalk, *spmX* is required for sub-polar stalk synthesis, but phosphate  
429 starvation results in polar stalk synthesis in the *spmX* mutant [11]. Perhaps the  
430 synthesis of non-polar stalks has additional topological constraints that are more easily  
431 solved by the separation of the recruitment and scaffolding processes into two different  
432 proteins as we have described here, as this separation may be more adaptable for  
433 generating unique morphologies. Comparative analysis of the requirements for stalk  
434 synthesis in these three species provides an excellent model to determine how  
435 evolution can solve different morphological constraints.

436 Many questions remain regarding prosthecae synthesis in both *A. biprosthecum*  
437 specifically and the stalked Alphaproteobacteria in general. Even among closely related  
438 species there are phenotypic differences, such as the number and placement of stalks,  
439 as well as differences in the genes involved in stalk synthesis. Furthermore, in many  
440 stalked marine species, the stalk serves a reproductive function, with a budding  
441 daughter cell produced from the tip of the stalk [41-44]. How have these stalk synthesis  
442 pathways evolved? Are there core genes that are shared amongst bacteria that produce  
443 stalks? There are certainly differences, specifically between *C. crescentus* and  
444 *A. biprosthecum* (Table S1) [11], but what other genes are involved in *A. biprosthecum*  
445 stalk synthesis? ABI\_34190, the gene that lies upstream and overlaps *bacA* (Figure  
446 1C), is a putative M23 family metallopeptidase (Pfam 01551) whose predicted  
447 endopeptidase activity would cleave PG crosslinks. Thus, ABI\_34190 provides an

448 intriguing candidate for both its predicted function in PG remodeling and its genomic  
449 association with *bacA*. How do bactofilins function in stalk synthesis? Bactofilin's ability  
450 to polymerize appears to be important for function. Polymerization is thought to be  
451 mediated via hydrophobic interactions between conserved hydrophobic residues in the  
452 core DUF583 domain [28]. Point mutations in *C. crescentus* BacA identified residues  
453 that disrupt polymerization *in vitro* and are important for localization to the stalked pole  
454 [28]. Analogous mutations in the *H. pylori* bactofilin CcmA also disrupt polymerization *in*  
455 *vitro*, result in mislocalization *in vivo*, and, when expressed as the sole copy of CcmA,  
456 the mutant strains are morphologically indistinguishable from a *ccmA* null mutant [45].  
457 Taken together, these results show that bactofilin polymerization can be easily disrupted  
458 by mutating selected residues and that polymerization is required for proper localization  
459 and function *in vivo*. The terminal regions flanking the conserved bactofilin domain often  
460 vary between species. Do the N- and C-terminal domains serve any specific purposes?  
461 Work on *T. thermophilus* bactofilin showed that the N-terminal region is involved in  
462 membrane binding [31]. We used high detergent levels, a high micellization condition, to  
463 get purified BacA to form filaments *in vitro*. Our BACTH results suggest that the C-  
464 terminus is important for BacA-SpmX interaction. It seems likely that these N- and C-  
465 terminal regions play important roles in membrane and protein interactions.

466 This study has also revealed an unexpected role for a scaffold protein in inhibiting  
467 default modes of PG synthesis. In the absence of BacA, cells produce what we have  
468 termed "pseudostalks", which are significantly shorter and wider than stalks. In addition,  
469 BacA is required to constrain SpmX at the base of the stalk (Figure 7B), as observed by  
470 the mislocalization of SpmX-eGFP in the absence of BacA (Figure 7C). Pseudostalks,

471 like WT stalks, are composed of PG. However, unlike WT stalks, which are synthesized  
472 from the base of the stalk (Figure 7B), pseudostalks are the result of dispersed PG  
473 remodeling throughout the structure (Figure 7C). Thus, SpmX is sufficient to recruit PG  
474 synthesis enzymes to the pseudostalk in the absence of BacA, however we do not know  
475 yet if these are the same enzymes that normally drive stalk synthesis. We find a parallel  
476 for this phenomenon with the cytoskeletal scaffolding protein DivIVA in the  
477 Actinobacterium *Mycobacterium smegmatis*. Normal, rod-shaped *M. smegmatis*  
478 undergo asymmetric bipolar growth, and DivIVA focuses this cell envelope assembly at  
479 the poles [46]. When DivIVA is depleted, PG synthesis persists, but in a disorganized  
480 manner throughout the cell, leading to spherical cells [47]. Similarly, in the absence of  
481 BacA, PG synthesis persists, but in a disorganized manner leading to pseudostalks.  
482 Strikingly, we show that the pseudostalks that form in the absence of BacA can  
483 incorporate the default cell elongation and cell division modes, forming cell body  
484 extensions that contain DNA and can divide. These results suggest that the cytoskeletal  
485 bactofilin BacA not only organizes and constrains PG synthesis to specific subcellular  
486 locations (Figure 7B) but also inhibits PG synthesis associated with cell elongation and  
487 division and DNA entry at the site of stalk synthesis defined by SpmX. The decoupling  
488 of the recruitment and scaffolding roles for proteins that localize the PG synthesis  
489 complex may facilitate safeguarding against establishment of cell elongation and  
490 division at those morphogenetic sites. However, removal of a single layer of regulation  
491 (in this case, *A. biprosthicum* BacA) can lead to unregulated growth, with *A.*  
492 *biprosthicum* becoming a branching organism via pseudostalks. This follows an  
493 emerging theme of bacterial morphogenesis in which morphological variation results

494 from the differential regulation of PG remodeling [3, 48, 49]. In other words, much like  
495 the Actinobacteria *Streptomyces* spp., *A. biprosthicum* localizes PG synthesis at  
496 specific places with different morphological results: branching hyphae and stalks,  
497 respectively. Furthermore, this result suggests that at least some of the PG synthesis  
498 enzymes used for stalk synthesis are the same as those used for cell elongation and  
499 division, which may explain why we have yet to identify a PG synthesis enzyme used  
500 specifically for stalk synthesis.

501



502 **Acknowledgements**

503 The NIH supported this work with grants 2R01GM051986 and R35GM122556 (to  
504 Y.V.B.) and GM113172 to M.S.V. and Y.V.B. Y.V.B. is also supported by a Canada 150  
505 Research Chair in Bacterial Cell Biology. Structured illumination microscopy (3D-SIM)  
506 data acquisition was supported by NIH grant NIH1S10OD024988-01 to the Indiana  
507 University Bloomington Light Microscopy Imaging Center. We thank Barry Stein of the  
508 Indiana University Bloomington Electron Microscopy Center for training and assistance.  
509 We wish to thank members of the Brun Lab for support, advice, and encouragement,  
510 and, in particular, Cécile Berne, Marie Delaby, Kelley Gallagher, David Kysela, Emily  
511 Sprowls, Liu Yang, and Sébastien Zappa for critical manuscript reading and feedback.  
512 We thank Merrin Joseph of the (Malcolm) Winkler Lab (Indiana University) for rotation  
513 work that contributed to strain generation for this study. Wholehearted thanks for critical  
514 preprint review by the journal club of the (Pamela) Brown Lab (University of Missouri).

515 **Author Contributions**

516 Conceptualization, P.D.C. and Y.V.B.; Methodology, P.D.C., M.J., and Y.V.B.;  
517 Investigation, P.D.C. and M.J.; Resources, Y.V.B. and fluorescent D-amino acids  
518 (FDAAs) from M.S.V.; Writing – Original Draft, P.D.C; Writing – Review and Editing,  
519 P.D.C., M.J., and Y.V.B.; Visualization, P.D.C.; Supervision, Y.V.B.; Funding  
520 Acquisition, Y.V.B.

521 **Declaration of Interests**

522 The authors declare no competing interests.

## 523 **Main Figure Titles and Legends**

524 **Figure 1. Comparison of *Caulobacter crescentus* and *Asticcacaulis biprosthecum***  
525 **Bactofilins.** (A) Dimorphic life cycle of *A. biprosthecum*. A common characteristic of  
526 prosthecate Alphaproteobacteria, the prosthecate mother cell produces an adhesive  
527 holdfast (shown in grey) at one pole. Cell division results in a motile, nonreplicating  
528 swarmer cell that differentiates into a prosthecate cell. Red arrows indicate the base of  
529 *A. biprosthecum* stalks. Green circles indicate SpmX localization. (B) Schematic of the  
530 BacA protein from *A. biprosthecum*. The conserved bactofilin (DUF583) domain is  
531 shown in blue. (C) Schematics of the bactofilin gene loci for both *C. crescentus* and *A.*  
532 *biprosthecum*. (D) Alignment of *A. biprosthecum* BacA (ABI\_34180) and *C. crescentus*  
533 BacA<sub>Cc</sub>/BacB<sub>Cc</sub> (CC1873/CC3022). Conserved residues are shown in red boxes, similar  
534 residues in yellow boxes with bold characters. The secondary structure of *A.*  
535 *biprosthecum* BacA ("BacA\_ABI34180") was modeled using the SWISS-MODEL server  
536 [50] with the structure of *C. crescentus* BacA<sub>Cc</sub> ("BacA\_1873"; PDB code 2N3D) as a  
537 template [51]. The secondary structures of *C. crescentus* BacA<sub>Cc</sub> (PDB code 2N3D) and  
538 the predicted ones for *A. biprosthecum* BacA are indicated below and above the  
539 sequence alignment, respectively. Residues are numbered according to *A.*  
540 *biprosthecum* BacA. (E) Transmission electron microscopy (TEM) of BacA protofilament  
541 bundles from *C. crescentus* taken in detergent free conditions (top) and *A.*  
542 *biprosthecum* taken in the presence of 10% Triton X-100 (bottom). To distinguish from  
543 background, red arrows indicate *A. biprosthecum* BacA protofilaments. Scale bars = 1  
544  $\mu\text{m}$ . See also Table S1.

545 **Figure 2. BacA is Required for WT Stalk Synthesis.** Analysis of stalk morphology in  
546 strains YB642 (WT), YB9183 (WT + pMR10 empty vector control), YB8597 ( $\Delta bacA$ ),  
547 YB8620 ( $\Delta bacA$  + pMR10 empty vector control), and YB8601 ( $\Delta bacA$  + pMR10-P<sub>bacA</sub>-  
548 *bacA*). Cells were grown in rich medium (PYE) to saturation and sub-cultured into  
549 phosphate limited (HIGG) medium at 26°C for 72h (see culturing details in Experimental  
550 Model and Subject Details). (A) Phase microscopy (left) and cell silhouette (right) for  
551 strains YB642 (WT), YB8597 ( $\Delta bacA$ ), and YB8601 ( $\Delta bacA$  + pMR10-P<sub>bacA</sub>-*bacA*).  
552 Scale bars = 2  $\mu\text{m}$ . (B) Transmission electron microscopy (TEM) for strains YB642  
553 (WT), YB8597 ( $\Delta bacA$ ), and YB8601 ( $\Delta bacA$ +pMR10-P<sub>bacA</sub>-*bacA*).  $\Delta bacA$  pseudostalks  
554 are indicated with red arrows. Scale bars = 2  $\mu\text{m}$ . (C) Summary statistics for data  
555 presented in Figure 2D, 2E, and 2F. Data shown is mean (SD). (D) Distribution of  
556 stalk/pseudostalk base diameter in the populations. Data (WT n=13; WT+EV n=19;  
557  $\Delta bacA$  n=8;  $\Delta bacA$ +EV n=13;  $\Delta bacA$ +P<sub>bacA</sub>-*bacA* n= 17) are from single samples with  
558 five TEM fields per sample. Data are represented as box and whisker plots [52] where  
559 the middle line represents the median, the lower and upper hinges correspond to the  
560 first and third quartiles (the 25th and 75th percentiles), and the upper whisker extends  
561 from the hinge to the largest value no further than 1.5 \* IQR from the hinge (where IQR  
562 is the inter-quartile range, or distance between the first and third quartiles). The lower  
563 whisker extends from the hinge to the smallest value at most 1.5 \* IQR of the hinge.  
564 Data beyond the end of the whiskers are called "outlying" points and are plotted  
565 individually. A mirrored density violin plot [53] is underlaid to show the continuous  
566 distribution of the data. Violin plots have been scaled to the same width. (\*\*p  $\leq$  0.001,  
567 ns = not significant; two-sided t-test). (E) Distribution of stalk/pseudostalk lengths in the

568 populations, measured from the tip of the structure to the cell body. Data (WT n=412;  
569 WT+EV n=321;  $\Delta bacA$  n=153;  $\Delta bacA$ +EV n=148;  $\Delta bacA$ +P<sub>*bacA*</sub>-*bacA* n=324) are from  
570 three independent biological replicates with five phase microscopy fields per replicate.  
571 Data are plotted on a log<sub>10</sub> scale y-axis and are represented as box and whisker plots  
572 and violin plots in the same manner as Figure 2D. As length data are approximately log-  
573 normally distributed, significant difference testing was performed on log<sub>10</sub> transformed  
574 data (\*\*p ≤ 0.001, ns = not significant; two-sided t-test). (F) Percentage of cells with WT  
575 stalks. Cells in phase images from Figure 2A were scored as having a WT stalk (i.e. a  
576 thin extension from the cell body). Cells exhibiting thick and aberrant pseudostalks were  
577 excluded. Data (total cells counted: WT n=735; WT+EV n=615;  $\Delta bacA$  n=841;  
578  $\Delta bacA$ +EV n=1259;  $\Delta bacA$ +P<sub>*bacA*</sub>-*bacA* n=831) are from four independent biological  
579 replicates with five phase microscopy fields per replicate. Data are represented as the  
580 mean (SD) percentage of cells with stalks. (\*\*p ≤ 0.001, \*p ≤ 0.01, ns = not significant  
581 > 0.05; two-sided t-test). See also Figure S1.

582 **Figure 3. BacA Localizes After Cell Division, Localizes to the Base of Stalks, and**  
583 **Requires SpmX for Localization.** Subcellular localization of BacA-mVenus in strains  
584 YB7474 (*bacA::bacA-mVenus*) and YB7487 ( $\Delta spmX$  *bacA::bacA-mVenus*) grown in rich  
585 medium (PYE) at 26°C for 24-48h. (A-B) Time lapse microscopy montage showing the  
586 dynamics of BacA-mVenus localization in (A) strain YB7474 (*bacA::bacA-mVenus*) or  
587 (B) strain YB7487 (*bacA::bacA-mVenus*  $\Delta spmX$ ). Yellow arrows and text show the  
588 transition from pre-septation to post-septation. Yellow black-bordered triangles mark the  
589 appearance of new BacA-mVenus foci in recently divided daughter cells. Septation  
590 events and the corresponding foci appearance are numbered. Frames show images  
591 taken every (A) 28 minutes or (B) 30 minutes. Scale bars = 2 μm. (C) Dimorphic life  
592 cycle of *A. biprosthecum*. The prosthecate mother cell produces an adhesive holdfast  
593 (shown in gray) at one pole. Cell division results in a motile, nonreplicating swarmer cell  
594 that differentiates into a prosthecate cell. Green circles indicate SpmX localization.  
595 Yellow circles indicate BacA localization. (D) BacA-mVenus subcellular localization.  
596 Phase merge and fluorescence microscopy images. Scale bars = 2 μm. (E) Population  
597 level heatmaps of BacA-mVenus subcellular localization. Number of foci analyzed is  
598 shown on the bottom left of each heatmap. (F) Single cell BacA-mVenus foci tracking.  
599 Tracks are colored by time, with blue representing the earliest timepoints and red  
600 representing the latest time points. Scale bars = 1 μm. (G) Velocity tracking of multiple  
601 BacA-mVenus foci from time-lapse videos. Particle tracking was performed and velocity  
602 (μm/s) from frame-to-frame for each focus was calculated. Each color represents the  
603 track of individual foci as they appear. See also Figures S1 & S3 and Videos S1-S4.

604 **Figure 4. BacA is not Required to Localize SpmX-eGFP, but is Required to**  
605 **Constrain SpmX-eGFP at the Base of the Stalk and to Constrain the Size of SpmX-**  
606 **eGFP Maxima.** (A-F) Subcellular localization of SpmX-eGFP in strains YB5692  
607 (*spmX::spmX-eGFP*), YB7561 (*spmX::spmX-eGFP*  $\Delta bacA$ ), and YB9521 (*spmX::spmX-*  
608 *eGFP*  $\Delta bacA$ +P<sub>*bacA*</sub>-*bacA*). Cells were grown in rich medium (PYE) to saturation and  
609 sub-cultured into phosphate limited (HIGG) medium at 26°C for 72h. (A-B) Time lapse  
610 microscopy montage showing the dynamics of SpmX-eGFP localization in (A) strain  
611 YB5692 (*spmX::spmX-eGFP*) or (B) strain YB7561 (*spmX::spmX-eGFP*  $\Delta bacA$ ). Green  
612 black-bordered triangles mark the appearance of new SpmX-eGFP foci in predivisional  
613 daughter cells. Green arrows and text show the transition from pre-septation to post-

614 septation. Foci appearance and the corresponding septation events are numbered.  
615 Frames show images taken every 30 minutes. Scale bars = 2  $\mu\text{m}$ . (C) SpmX-eGFP  
616 subcellular localization. Phase merge and fluorescence microscopy images. Scale bars  
617 = 2  $\mu\text{m}$ . (D) Population level heatmaps of SpmX-eGFP subcellular localization. Number  
618 of foci analyzed is shown on the bottom left of each heatmap. (E) Distribution of  
619 orthogonal distance ( $\mu\text{m}$ ) of each SpmX-eGFP maxima from the medial axis of its  
620 associated parent cell. Data set is the same as used in Figure 4D. Data are plotted on a  
621 continuous y-axis and are represented as box and whisker plots as described in Figure  
622 2D. (\*\* $p \leq 0.001$ , ns = not significant  $> 0.05$ ; two-sided t-test). (F) Distribution of SpmX-  
623 eGFP maxima area ( $\text{nm}^2$ ) in the populations. Data set is the same as used in Figure 4D.  
624 Data are plotted on a  $\log_{10}$  scale y-axis and are represented as box and whisker plots  
625 as described in Figure 2D. (\*\* $p \leq 0.001$ , \*\* $p \leq 0.01$ , ns = not significant  $> 0.05$ ; two-  
626 sided t-test). (G) A  $\Delta bacA \Delta spmX$  double mutant phenocopies a  $\Delta spmX$  single mutant.  
627 Representative phase images of YB642 (WT), YB8597 ( $\Delta bacA$ ), YB8237 ( $\Delta spmX$ ), and  
628 YB7489 ( $\Delta bacA \Delta spmX$ ). Cells were grown in rich medium (PYE) to saturation and sub-  
629 cultured into phosphate limited (HIGG) medium at 26°C for 48h-72h before imaging. WT  
630 cells produce stalks (top left),  $\Delta bacA$  cells produce pseudostalks (top right, red arrows),  
631 and both  $\Delta spmX$  and  $\Delta bacA \Delta spmX$  cells are stalkless (bottom). Scale bars = 2  $\mu\text{m}$ .  
632 See also Figures S2 & S3 and Videos S5 & S6.

633 **Figure 5. BacA-mVenus and SpmX-mCherry *in vivo* Colocalization and Bacteria**  
634 **Adenylate Cyclase Two-Hybrid (BACTH) Assays Showing *in vivo* Interaction of**  
635 **SpmX and BacA.** (A) Representative images of dual labeled strain YB9466  
636 (*bacA::bacA-mVenus spmX::spmX-mCherry*), with a cell exhibiting almost complete  
637 overlap of signals (top), a cell exhibiting BacA-mVenus and SpmX-mCherry foci at both  
638 putative sites of stalk synthesis (middle), and a cell with WT stalks, showing functionality  
639 of the fusion proteins (bottom). Pearson's Correlation Coefficient (PCC) was used to  
640 quantify colocalization of signal intensity between the two fluorophore channels (BacA-  
641 mVenus and SpmX-mCherry) within the cells. PCC values range from -1 indicating a  
642 strong negative correlation (anticolocalization) to +1 indicating a strong positive  
643 correlation (colocalization), with a value of 0 indicating no correlation  
644 (noncolocalization). Only cells that contained both BacA-mVenus and SpmX-mCherry  
645 foci located at the midcell were used ( $n = 179$ ). Mean (SD) PCC =  $0.48 \pm 0.23$ , showing  
646 an overall positive correlation. (B-E) BTH101 *E. coli* were co-transformed with T25 and  
647 T18 based recombinant plasmids. Transformants were then grown in selective medium  
648 containing 0.5 mM IPTG and patched on selective indicator plates containing X-gal 40  
649  $\mu\text{g ml}^{-1}$  and 0.5 mM IPTG for ~24 hours at 30°C. As this is a  $\beta$ -galactosidase assay,  
650 blue patches indicate a positive *in vivo* interaction between the two recombinant  
651 proteins. Positive control ("+ Ctrl") for all assays is T25-Zip and T18-Zip fusion proteins.  
652 Negative controls are unfused T18 or T25 fragments in combination with the  
653 experimental fusion protein or the cognate unfused T25 or T18 fragments. Patches  
654 shown are representative of independent biological triplicates for each combination. (B)  
655 C-terminal fused T25 + N-terminal fused T18. (C) C-terminal fused T25 + C-terminal  
656 fused T18. (D) N-terminal fused T25 + N-terminal fused T18. (E) N-terminal fused T25 +  
657 C-terminal fused T18.

658 **Figure 6. Peptidoglycan (PG) Composition & Remodeling and Septation & DNA**  
659 **Content in WT Stalks and  $\Delta bacA$  Pseudostalks.** (A) Transmission electron

660 microscopy (TEM) of prepared PG sacculi for strains YB642 (WT) and YB8597 ( $\Delta bacA$ ).  
661 Cells were grown in rich medium (PYE) to saturation and sub-cultured into phosphate  
662 limited (HIGG) medium at 26°C for 72h before preparing sacculi. Sacculi were prepared  
663 by boiling in SDS for 30 minutes followed by washing  $\geq 6X$  with dH<sub>2</sub>O. Scale bars = 1  
664  $\mu\text{m}$ . (B) Medium pulse FDAA (TADA) labeling showing active PG remodeling in strains  
665 YB642 (WT) and YB8597 ( $\Delta bacA$ ). Cells were grown in rich medium (PYE) to saturation  
666 and sub-cultured into phosphate limited (HIGG) medium at 26°C for 72h ) before  
667 labeling. Cells were washed with 2X PYE, labeled with 500  $\mu\text{M}$  TADA for 45 minutes,  
668 washed 2X with PYE, and imaged with phase and fluorescence microscopy.  
669 Representative images are shown. Scale bars = 2  $\mu\text{m}$ . (C) Virtual time lapse: Short  
670 pulse, sequential, dual FDAA (TADA and HADA) labeling showing active PG  
671 remodeling in strains YB5692 (*spmX::spmX-eGFP*) and YB7561 (*spmX::spmX-eGFP*  
672  $\Delta bacA$ ). Cells were grown in rich medium (PYE) to saturation and sub-cultured into  
673 phosphate limited (HIGG) medium at 26°C for 72h before labeling. Cells were washed  
674 2X with PYE, labeled with 500  $\mu\text{M}$  HADA for 6 minutes, washed 2X with PYE, labeled  
675 with 500  $\mu\text{M}$  TADA for 3 minutes, washed 2X with PYE, and imaged via 3D-SIM  
676 (Structured Illumination Microscopy). Representative images are shown. Scale bars = 1  
677  $\mu\text{m}$ . (D) Pulse-chase time-lapse of FDAA (TADA) labeling for strains YB642 (WT) and  
678 YB8597 ( $\Delta bacA$ ) showing loss of labeling as peptidoglycan is actively remodeled.  
679 Yellow triangles with black outline indicate loss of TADA signal in YB642 (WT) as stalk  
680 is extended from the base. Cells were grown in rich medium (PYE) to saturation and  
681 sub-cultured into phosphate limited (HIGG) medium at 26°C for 60h before labeling. To  
682 label whole cells, 250  $\mu\text{M}$  TADA was added and cells were allowed to grow an  
683 additional ~12-14h (overnight). Cells were then washed 2X with PYE to remove TADA  
684 and imaged via time-lapse with phase and fluorescence microscopy. Scale bars = 2  $\mu\text{m}$ .  
685 (E) Pulse-chase time-lapse of FDAA (TADA) labeling for strains YB8597 ( $\Delta bacA$ )  
686 showing elongation and septation of a pseudo-stalk. Yellow triangles with black outline  
687 indicate the septation site. Cells were grown as described in Figure 6D. Scale bars = 2  
688  $\mu\text{m}$ . (F) DAPI staining for DNA in strains YB642 (WT) and YB8597 ( $\Delta bacA$ ) showing  
689 DNA is present in the pseudo stalk (yellow triangles). Representative images are  
690 shown. Scale bars = 2  $\mu\text{m}$ . See also Video S7.

691 **Figure 7. Model of the Stalk PG Biosynthetic Complex in *A. biprosthecum*.** (A)  
692 Dimorphic life cycle of *A. biprosthecum*. The prosthecate mother cell produces an  
693 adhesive holdfast (shown in gray) at one pole. Cell division results in a motile,  
694 nonreplicating swarmer cell that differentiates into a prosthecate cell. Green circles  
695 indicate SpmX localization. Yellow circles represent BacA localization. Numbers in  
696 parentheses, (1)-(4), indicate stages of WT stalk synthesis as described in Figure 7B.  
697 (B) Model of *A. biprosthecum* WT stalk synthesis. (1) SpmX (green) appears early in the  
698 cell cycle, prior to cell division, where it marks the future site of stalk synthesis. (2)  
699 SpmX recruits the putative PG remodeling complex (blue) and the BacA scaffold  
700 (yellow) to the site of stalk synthesis. (3) PG synthesis is initiated at the site defined by  
701 SpmX localization and in an area constrained by BacA. (4) As PG synthesis progresses  
702 and the stalk elongates, synthesis is constrained at the base of the stalk by the BacA  
703 scaffold. Timing of these stages in the cell cycle are indicated by the matching numbers  
704 in Figure 7A. (C) Model of *A. biprosthecum*  $\Delta bacA$  pseudostalk synthesis. As with WT  
705 cells, (1) SpmX (green) appears early in the cell cycle, prior to cell division, where it

706 marks the future site of stalk synthesis. (2) SpmX recruits the putative PG remodeling  
707 complex (blue), but without BacA. (3) PG synthesis is initiated at the site defined by  
708 SpmX localization. (4) As PG synthesis progresses, there is no BacA scaffold to  
709 constrain the complex at the base of the synthesis site; PG synthesis occurs  
710 promiscuously throughout, with SpmX localized to the distal end of the structure,  
711 leading to short, wide pseudostalks. Timing of these stages in the cell cycle are  
712 indicated by the matching numbers in Figure 7A.

713 **STAR Methods**

714 **RESOURCE AVAILABILITY**

715 **Lead Contact**

716 Further information and requests for resources and reagents should be directed to and  
717 will be fulfilled by the Lead Contact, Yves V. Brun ([yves.brun@umontreal.ca](mailto:yves.brun@umontreal.ca)).

718 **Materials Availability**

719 Unique plasmids and bacterial strains generated in this study are available upon  
720 request from the Lead Contact.

721 **Data and Code Availability**

722 Source data used in this paper for Figures 2C-2F, 3G, 4E-4F, S1, and S2 are available  
723 at Caccamo, Paul (2020), "A Division of Labor in the Recruitment and Topological  
724 Organization of a Bacterial Morphogenic Complex - Raw Data", Mendeley Data, v1.  
725 <http://dx.doi.org/10.17632/6q8zx4r6kj.1>

726 **EXPERIMENTAL MODEL AND SUBJECT DETAILS**

727 All freezer stocks were maintained in 10% DMSO at -80°C. *A. biprotheticum* strains  
728 used in this study were grown in liquid PYE medium at 26°C supplemented with  
729 antibiotics or supplements as necessary (kanamycin 5 µg ml<sup>-1</sup>, gentamicin 0.5 µg ml<sup>-1</sup>,  
730 spectinomycin 25 µg ml<sup>-1</sup>, streptomycin 5 µg ml<sup>-1</sup>, and 0.3 mM diaminopimelic acid).  
731 Strains were maintained on PYE plates at 26°C supplemented with antibiotics or  
732 supplements as necessary (kanamycin 5 or 20 µg ml<sup>-1</sup>, gentamicin 2.5 µg ml<sup>-1</sup>,  
733 spectinomycin 50 µg ml<sup>-1</sup>, streptomycin 20 µg ml<sup>-1</sup>, 3% sucrose, and 0.3 mM  
734 diaminopimelic acid). For phosphate starvation, cells were grown in Hutner base-  
735 imidazole-buffered-glucose-glutamate (HIGG) medium [54] containing 30 µM phosphate  
736 (phosphate-limited), supplemented with biotin at 40 ng ml<sup>-1</sup> and antibiotics where  
737 appropriate. For microscopy of PYE grown samples, strains were inoculated in PYE

738 from colonies and grown at 26°C with shaking until mid- to late-exponential phase  
739 (OD<sub>600</sub> ≥ 1.0) before imaging. For microscopy of HIGG grown, phosphate-limited  
740 samples, strains were inoculated in PYE from colonies and grown at 26°C with shaking  
741 until late-exponential phase. Cultures were then washed 2X with deionized distilled H<sub>2</sub>O  
742 (ddH<sub>2</sub>O), diluted 1:20 in HIGG, and grown at 26°C with shaking for 72h before imaging.  
743 *E. coli* strains used in this study grown in liquid lysogeny broth (LB) medium at 37°C (or  
744 30°C for BACTH assays) supplemented with antibiotics or supplements as necessary  
745 (ampicillin 100 µg ml<sup>-1</sup>, kanamycin 30 µg ml<sup>-1</sup>, gentamicin 15 µg ml<sup>-1</sup>, spectinomycin 100  
746 µg ml<sup>-1</sup>, streptomycin 30 µg ml<sup>-1</sup>, 0.3 mM diaminopimelic acid, and X-gal 40 µg ml<sup>-1</sup>).  
747 Strains were maintained on LB plates at 37°C (or 30°C for BACTH assays)  
748 supplemented with antibiotics or supplements as necessary (ampicillin 100 µg ml<sup>-1</sup>,  
749 kanamycin 25 or 50 µg ml<sup>-1</sup>, gentamicin 20 µg ml<sup>-1</sup>, streptomycin 30 or 100 µg ml<sup>-1</sup>, 0.3  
750 mM diaminopimelic acid (DAP), X-gal 40 µg ml<sup>-1</sup>, and 0.5 mM IPTG). Electroporation of  
751 *A. biprosthicum* was performed as previously described [55]. Outgrowth was performed  
752 for 8-24h at 26°C. For electroporation with replicating plasmids, 100 µl of outgrowth  
753 culture was plated on PYE plates with appropriate selection at dilutions of 10<sup>1</sup>, 10<sup>0</sup>, and  
754 10<sup>-1</sup>. For electroporation with integrating plasmids, outgrowth was divided into volumes  
755 of 100, 300, and 600 µl and plated on PYE plates with appropriate selection. In-house  
756 stocks of chemically competent BL21IDE3 (YB1000), DAP auxotroph WM3064  
757 (YB7351), XL-1 Blue (YB0041), and BTH101 (YB9171) *E. coli* cells were prepared as  
758 previously described [56, 57]. A detailed list of strains is included as **Table S3**.

## 759 **METHOD DETAILS**

### 760 **Recombinant DNA Methods**



761 DNA amplification, Gibson cloning, and restriction digests were performed according to  
762 the manufacturer. Restriction enzymes and Gibson cloning mix were from New England  
763 Biolabs. Cloning steps were carried out in *E. coli* (alpha-select competent cells, Bioline  
764 or XL1-Blue, Stratagene) and plasmids were purified using Zyppy Plasmid Kits (Zymo  
765 Research Corporation). Sequencing was performed by the Indiana Molecular Biology  
766 Institute and Eurofins MWG Operon Technologies with double stranded plasmid or PCR  
767 templates, which were purified with a DNA Clean & Concentrator kits (Zymo Research  
768 Corporation). Chromosomal DNA was purified using the Bactozol Bacterial DNA  
769 Isolation Kit (Molecular Research Center). Plasmids were introduced into all *E. coli*  
770 strains using chemical transformation according to the manufacturer's protocols.  
771 Electroporation of *A. biprosthicum* was performed as previously described [55].  
772 Outgrowth was performed for 8-24h at 26°C. For electroporation with replicating  
773 plasmids, 100 µl of outgrowth culture was plated on PYE plates with appropriate  
774 selection at dilutions of 10<sup>1</sup>, 10<sup>0</sup>, and 10<sup>-1</sup>. For electroporation with integrating plasmids,  
775 outgrowth was divided into volumes of 100, 300, and 600 µl and plated on PYE plates  
776 with appropriate selection. Mating of plasmids into *A. biprosthicum* was performed  
777 using the *dap*<sup>-</sup> *E. coli* strain WM3064 (YB7351) [58]. Allelic exchange and deletions  
778 were achieved using a two-step sucrose counterselection procedure with  
779 pNPTS138/pNPTS139. Insertional fusions of eGFP and mVenus were made using  
780 pGFPC-1 and pVENC-4, respectively [59]. BACTH plasmids were made using the  
781 Euromedex BACTH System Kit (Euromedex Cat. No. EUK001).

## 782 **Plasmid Construction**

783 All PCR, including insert fragments for Gibson assembly, was performed using iProof  
784 High-Fidelity DNA Polymerase (Bio-Rad Laboratories, Inc., Cat. No. 1725302)

785 according to the manufacturer's instructions. All plasmids were constructed via Gibson  
786 assembly using NEBuilder HiFi DNA Assembly Master Mix (New England Biolabs, Inc.,  
787 Cat. No. E2621X) according to the manufacturer's instructions. Prior to use in cloning,  
788 all restriction enzyme digested plasmids were treated with Calf Intestinal Alkaline  
789 Phosphatase (New England Biolabs, Inc., Cat. No. M0290S) according to the  
790 manufacturer's instructions. All primers for Gibson assembly were designed using  
791 NEBuilder Assembly Tool (New England Biolabs, Inc.). For the *bacA* complementation  
792 vector, we fused the promoter region, comprising 236 bp immediately upstream of  
793 ABI\_34190, to the coding region of *bacA* and placed the promoter/gene fusion on the  
794 low copy plasmid pMR10. The promoter/gene fusion is placed in the opposite  
795 orientation of the lacZ promoter. The restriction enzymes used are as follows for  
796 pNPTS138/pNPTS139-based vectors (*EcoRV* or *SphI/NheI*), pET28a+ (*SaII/SacI*),  
797 pMR10 (*EcoRV*), pVENC-4 (*NdeI/KpnI*), and BACTH plasmids (*KpnI/EcoRI*). A detailed  
798 list of plasmids and primers can be found in the **STAR Methods Key Resources Table**,  
799 **Table S2 (plasmids)**, and **Table S4 (primers)**.

## 800 **Microscopy**

### 801 *Light Microscopy and Fluorescence Imaging*

802 For light microscopy analysis, cells were spotted onto pads made of 1% SeaKem LE  
803 Agarose (Lonza, Cat. No. 50000) in PYE and topped with a glass coverslip. When  
804 appropriate, the coverslip was sealed with VALAP (vaseline, lanolin, and paraffin at a  
805 1:1:1 ratio). Images were recorded with inverted Nikon Ti-E microscopes using either 1)  
806 a Plan Apo 60X 1.40 NA oil Ph3 DM objective with DAPI/FITC/Cy3/Cy5 or  
807 CFP/YFP/mCherry filter cubes and an iXon X3 DU885 EMCCD camera or 2) a Plan  
808 Apo  $\lambda$  100X 1.45 NA oil Ph3 DM objective with DAPI/FITC/Cy3/Cy5 or

809 CFP/YFP/mCherry filter cubes and a Photometrics Prime 95B sCMOS camera. Images  
810 were processed with NIS Elements software (Nikon). To visualize DNA, cells were  
811 grown in HIGG medium for 72h as described above. Cells were washed 1x with PYE  
812 and 1  $\mu$ l of cell suspension was spotted onto a coverslip and topped with an agar pad.  
813 Cells were monitored via phase microscopy for ~1h to ensure they were growing and 20  
814  $\mu$ l of 1 mg/ml of 4',6-diamidino-2-phenylindole dihydrochloride (DAPI) was spotted on  
815 top of the agar pad. DAPI was allowed to diffuse through the pad to the cells and cells  
816 were imaged.

#### 817 *Structured Illumination Microscopy*

818 3D-SIM images were collected on a DeltaVision OMX system (Applied Precision Inc.,  
819 Issaquah, USA) equipped with a 1.4NA Olympus 100X oil objective. A 405 nm laser  
820 source and 419-465 nm emission filter were used for collecting HADA signal. A 488 nm  
821 laser source and 500-550 nm emission filter were used for collecting GFP signal. A 568  
822 nm laser source and 609-654 emission filter were used for collecting TADA signal. The  
823 z-axis scanning depth was 2  $\mu$ m. Immersion oil with refraction index of 1.514 was used.  
824 SIM images were reconstructed using softWoRx.

#### 825 *Electron Microscopy*

826 10  $\mu$ l cell or sacculi suspension was applied to an electron microscopy grid  
827 (Formvar/Carbon on 300 mesh; Ted Pella Inc., Cat. No. 01753-F) for 5 min at room  
828 temperature. Excess liquid was removed with Whatman filter paper. Cells or sacculi  
829 were then negatively stained with 10  $\mu$ l 1% uranyl acetate (UA) and excess UA liquid  
830 was immediately removed with Whatman filter paper. Grids were allowed to dry, stored  
831 in a grid holder in a desiccation chamber, and imaged with a kV JEOL JEM 1010  
832 transmission electron microscope (JEOL USA Inc.). Protein visualization was performed

833 as sacculi suspension except protein was applied to the grid for 1 min and stained with  
834 2% UA before imaging.

### 835 **Sacculi purification**

836 Strains were inoculated in 3 ml PYE from colonies and grown at 26°C with shaking until  
837 late-exponential phase. Cultures were then washed 2X with ddH<sub>2</sub>O, diluted 1:50 in  
838 HIGG, and grown at 26°C with shaking for 72h. Cells were harvested by centrifugation  
839 (7,000 g, 4°C, 15 min) and resuspended in 10 ml ddH<sub>2</sub>O. Cell suspension was added  
840 dropwise to 20 ml boiling 7.5% SDS in a 125 ml flask with a stir bar. Once cells addition  
841 was complete, the SDS cell suspension was boiled for 30 min with stirring and then  
842 allowed to cool to room temperature. Suspension was then washed 6X with ddH<sub>2</sub>O  
843 using centrifugation (100,000 g, 25°C, 30 min) to isolate the sacculi pellet and  
844 resuspended in 5 ml ddH<sub>2</sub>O before imaging.

### 845 **Protein purification**

846 Recombinant plasmids overproducing His<sub>6</sub>-BacA protein were transformed into BL21 *E.*  
847 *coli* strain. Transformants were grown, in LB medium supplemented with kanamycin (50  
848 µg ml<sup>-1</sup>), at 37°C until the OD<sub>600</sub> = 0.6. Expression was induced by adding 0.5 mM IPTG  
849 (isopropyl β-D-thiogalactopyranoside) and incubation was continued either 3h at 30°C  
850 or overnight at 20°C. Cells pellets were resuspended in 1/25 volume of Buffer A  
851 (TrisHCl at pH 8, 300 mM NaCl, 2 mM β-mercaptoethanol) and lysed by sonication (20  
852 sec On / 40 sec Off, 5 min, Misonix S4000). Cells debris were pelleted by centrifugation  
853 at 36,000 g for 30 min at 4°C. The supernatant was loaded on a Ni-NTA resin (Qiagen)  
854 on an AKTA FPLC pure system. After washing with Buffer A, the protein was eluted with  
855 a linear gradient of Buffer B (50 mM TrisHCl at pH 8, 300 mM NaCl, 2 mM β-  
856 mercaptoethanol, 500 mM imidazole). Elution fraction was loaded on SDS page gel and

857 peak fractions containing the protein were pooled. Upon purification, His<sub>6</sub>-BacA protein  
858 was used for polymerization assay. Polymerization assay were performed by dialyzing  
859 His<sub>6</sub>-BacA in Buffer C (25 mM TrisHCl at pH 8, 250 mM NaCl, 2 mM β-mercaptoethanol)  
860 supplemented with 10% Triton X-100 in the case of BacA.

## 861 **Western blots**

862 All strains were grown until OD=1.0 before being centrifuged and resuspended in 100 μl  
863 of 1xPBS supplemented with 0.1 μl of Universal Nuclease (Pierce #88700) sonicated for  
864 3 times for 10sec at 50% intensity (Misonix S4000). Protein concentration was  
865 measured and normalized if needed before addition of laemmli buffer. 15 μl of each  
866 sample was loaded onto 4-20% precast polyacrylamide gels (BioRad) before being  
867 transferred on a nitrocellulose membrane according to manufacturer's instructions.  
868 Loading was controlled by Ponceau's staining before immunoblotting was performed by  
869 addition of an anti-GFP polyclonal antibody (MBL #598) as the primary antibody and a  
870 goat anti-rabbit HRP (Pierce) as secondary antibody. Transferred blots were visualized  
871 with SuperSignal West Pico substrate (ThermoFisher Scientific) using a Bio-Rad  
872 Chemidoc.

## 873 **QUANTIFICATION AND STATISTICAL ANALYSIS**

### 874 **Bioinformatics**

875 Genomic and protein sequence data were obtained from the Integrated Microbial  
876 Genomes (IMG) database [60]. Multiple sequence alignment of bactofilin sequences  
877 was performed using Jalview [61] with a MAFFT alignment using the L-INS-i preset. The  
878 *C. crescentus* BacB<sub>Cc</sub> protein sequence used for alignment is a translation of an open  
879 reading frame in CC3022 that initiates at a downstream ATG codon, as described  
880 previously [12]. The predicted structure of *A. biprosthicum* BacA (ABI\_34180) was

881 modeled using SWISS-MODEL [50] with the structure of *C. crescentus* BacA (CC1872;  
882 PBD code 2N3D) as a template. Alignment was then processed using the ESPript  
883 server [62]. Percent identity (PID) was calculated from pairwise MAFFT alignments  
884 using the L-INS-i preset.  $PID = \left( \frac{\# \text{ identical positions}}{\min(TG_A, TG_B)} \right) \times 100$ , where  $TG_A$  and  $TG_B$  are the  
885 sum of the number of residues and internal gap positions in sequences A and B in the  
886 alignment [63].

### 887 **Image analysis**

888 Stalk length and stalk percentage data was obtained using FIJI (Ejji Is Just ImageJ) [64].  
889 Briefly, phase micrographs were imported into FIJI and stalks were manually traced  
890 using the "Freehand Line" tool. Stalks lengths were determined from the manual trace  
891 using the "Measure" function, calibrated to the  $\mu\text{m}/\text{pixel}$  scale of the original micrograph.  
892 The percentage of stalked cells per image was calculated by manually counting the  
893 number of stalked and non-stalked cells per image. Subcellular localization of SpmX-  
894 eGFP and BacA-mVenus foci and subsequent localization heatmaps were generated  
895 using the ImageJ plugin MicrobeJ [65]. SpmX-eGFP maxima area and intensity were  
896 determined using the ImageJ plugin MicrobeJ [65]. Area was first generated as pixel  
897 area and converted to  $\text{nm}^2$  based on the pixel to  $\mu\text{m}$  ratio for the images. Intensity is  
898 defined as the average gray value measured on the channel used to detect the particle.  
899 Analysis of BacA-mVenus time-lapse videos and BacA-mVenus foci dynamics was  
900 performed using the ImageJ plugin TrackMate [66]. Colocalization analysis was  
901 performed by using MicrobeJ [65] to detect all cells that contained both BacA-mVenus  
902 and SpmX-mCherry foci and then measure colocalization by Pearson correlation  
903 coefficient. All statistical analysis and data visualization was generated in R version 3.5

904 [67] and using the ggplot2 [68] and ggsignif [69] packages. Cell silhouettes and cell  
905 body outlines were produced by importing the phase micrograph into Adobe Illustrator  
906 CC 2015.2.1 (Adobe Inc.) and manually tracing the silhouette or outline. The statistical  
907 details describing the quantification of cell morphology and fluorescent image analysis  
908 can be found in the respective figure legends.

## 909 **Supplemental Video Titles and Legends**

### 910 **Video S1. Timelapse of BacA-mVenus localization WT *A. biprosthecum* cells.**

911 Related to Figure 3 and Video S2. Subcellular localization timelapse of BacA-mVenus in  
912 strain YB7474 (*bacA::bacA-mVenus*) grown in rich medium (PYE) at 26°C for 24-48h.  
913 Video S1 was used to create the panels shown in Figure 3A.

### 914 **Video S2. Timelapse of BacA-mVenus localization WT *A. biprosthecum* cells.**

915 Related to Figure 3 and Video S1. Subcellular localization timelapse of BacA-mVenus in  
916 strain YB7474 (*bacA::bacA-mVenus*) grown in rich medium (PYE) at 26°C for 24-48h.  
917 Video S2 is an additional timelapse of a stalked cell, showing that BacA-mVenus is  
918 functional.

### 919 **Video S3. Timelapse of BacA-mVenus localization $\Delta$ *spmX* *A. biprosthecum* cells.**

920 Related to Figure 3 and Video S4. Subcellular localization timelapse of BacA-mVenus in  
921 strain YB7487 ( $\Delta$ *spmX bacA::bacA-mVenus*) grown in rich medium (PYE) at 26°C for  
922 24-48h. Video S3 was used to create the panels shown in Figure 3B.

### 923 **Video S4. Timelapse of BacA-mVenus localization $\Delta$ *spmX* *A. biprosthecum* cells.**

924 Related to Figure 3 and Video S3. Subcellular localization timelapse of BacA-mVenus in  
925 strain YB7487 ( $\Delta$ *spmX bacA::bacA-mVenus*) grown in rich medium (PYE) at 26°C for  
926 24-48h. Video S4 is an additional timelapse showing that BacA-mVenus foci dynamics  
927 in the  $\Delta$ *spmX* background.

### 928 **Videos S5. Timelapse of SpmX-eGFP localization in WT *A. biprosthecum* cells.**

929 Related to Figure 4. Subcellular localization of SpmX-eGFP in strain YB5692  
930 (*spmX::spmX-eGFP*). Cells were grown in rich medium (PYE) to saturation and sub-  
931 cultured into phosphate limited (HIGG) medium at 26°C for 72h. Video S5 was used to  
932 create the panels shown in Figure 4A.

### 933 **Videos S6. Timelapse of SpmX-eGFP localization in $\Delta$ *bacA* *A. biprosthecum* cells.**

934 Related to Figure 4. Subcellular localization of SpmX-eGFP in strain YB7561  
935 (*spmX::spmX-eGFP*  $\Delta$ *bacA*). Cells were grown in rich medium (PYE) to saturation and  
936 sub-cultured into phosphate limited (HIGG) medium at 26°C for 72h. Video S6 was used  
937 to create the panels shown in Figure 4B.

### 938 **Videos S7. Timelapse of FDAA pulse chase in $\Delta$ *bacA* *A. biprosthecum* cells.**

939 Related to Figure 6. Pulse-chase time-lapse of FDAA (TADA) labeling for strains  
940 YB8597 ( $\Delta$ *bacA*) showing elongation and septation of a pseudo-stalk. Cells were grown  
941 in rich medium (PYE) to saturation and sub-cultured into phosphate limited (HIGG)  
942 medium at 26°C for 60h before labeling. To label whole cells, 250  $\mu$ M TADA was added  
943 and cells were allowed to grow an additional ~12-14h (overnight). Cells were then  
944 washed 2X with PYE to remove TADA and imaged via time-lapse with phase and  
945 fluorescence microscopy. Video S7 was used to create the panels shown in Figure 6E.

946



947 **References**

- 948 1. Young, K.D. (2006). The selective value of bacterial shape. *Microbiol Mol Biol*  
949 *Rev* 70, 660-703.
- 950 2. Justice, S.S., Hunstad, D.A., Cegelski, L., and Hultgren, S.J. (2008).  
951 Morphological plasticity as a bacterial survival strategy. *Nature reviews*.  
952 *Microbiology* 6, 162-168.
- 953 3. Caccamo, P.D., and Brun, Y.V. (2018). The Molecular Basis of Noncanonical  
954 Bacterial Morphology. *Trends in microbiology* 26, 191-208.
- 955 4. Horvath, D.J., Jr., Li, B., Casper, T., Partida-Sanchez, S., Hunstad, D.A.,  
956 Hultgren, S.J., and Justice, S.S. (2011). Morphological plasticity promotes  
957 resistance to phagocyte killing of uropathogenic *Escherichia coli*. *Microbes Infect*  
958 13, 426-437.
- 959 5. Perez-Nunez, D., Briandet, R., David, B., Gautier, C., Renault, P., Hallet, B.,  
960 Hols, P., Carballido-Lopez, R., and Guedon, E. (2011). A new morphogenesis  
961 pathway in bacteria: unbalanced activity of cell wall synthesis machineries leads  
962 to coccus-to-rod transition and filamentation in ovococci. *Mol Microbiol* 79, 759-  
963 771.
- 964 6. Khandige, S., Asferg, C.A., Rasmussen, K.J., Larsen, M.J., Overgaard, M.,  
965 Andersen, T.E., and Moller-Jensen, J. (2016). DamX Controls Reversible Cell  
966 Morphology Switching in Uropathogenic *Escherichia coli*. *MBio* 7.
- 967 7. Flardh, K., Richards, D.M., Hempel, A.M., Howard, M., and Buttner, M.J. (2012).  
968 Regulation of apical growth and hyphal branching in *Streptomyces*. *Curr Opin*  
969 *Microbiol* 15, 737-743.
- 970 8. Wagner, J.K., Setayeshgar, S., Sharon, L.A., Reilly, J.P., and Brun, Y.V. (2006).  
971 A nutrient uptake role for bacterial cell envelope extensions. *Proc Natl Acad Sci*  
972 *U S A* 103, 11772-11777.
- 973 9. Wagner, J.K., and Brun, Y.V. (2007). Out on a limb: how the *Caulobacter* stalk  
974 can boost the study of bacterial cell shape. *Mol Microbiol* 64, 28-33.
- 975 10. Abraham, W.-R., Rohde, M., and Bennisar, A. (2014). The Family  
976 *Caulobacteraceae*. In *The Prokaryotes: Alphaproteobacteria and*  
977 *Betaproteobacteria*, E. Rosenberg, E.F. DeLong, S. Lory, E. Stackebrandt and F.  
978 Thompson, eds. (Berlin, Heidelberg: Springer Berlin Heidelberg), pp. 179-205.
- 979 11. Jiang, C., Brown, P.J., Ducret, A., and Brun, Y.V. (2014). Sequential evolution of  
980 bacterial morphology by co-option of a developmental regulator. *Nature* 506,  
981 489-493.

- 982 12. Kuhn, J., Briegel, A., Morschel, E., Kahnt, J., Leser, K., Wick, S., Jensen, G.J.,  
983 and Thanbichler, M. (2010). Bactofilins, a ubiquitous class of cytoskeletal  
984 proteins mediating polar localization of a cell wall synthase in *Caulobacter*  
985 *crenscentus*. EMBO J 29, 327-339.
- 986 13. Sycuro, L.K., Pincus, Z., Gutierrez, K.D., Biboy, J., Stern, C.A., Vollmer, W., and  
987 Salama, N.R. (2010). Peptidoglycan crosslinking relaxation promotes  
988 *Helicobacter pylori*'s helical shape and stomach colonization. Cell 141, 822-833.
- 989 14. Jackson, K.M., Schwartz, C., Wachter, J., Rosa, P.A., and Stewart, P.E. (2018).  
990 A widely conserved bacterial cytoskeletal component influences unique helical  
991 shape and motility of the spirochete *Leptospira biflexa*. Mol Microbiol 108, 77-89.
- 992 15. Randich, A.M., Kysela, D.T., Morlot, C., and Brun, Y.V. (2019). Origin of a Core  
993 Bacterial Gene via Co-option and Detoxification of a Phage Lysin. Curr Biol 29,  
994 1634-1646 e1636.
- 995 16. Billini, M., Biboy, J., Kuhn, J., Vollmer, W., and Thanbichler, M. (2019). A  
996 specialized MreB-dependent cell wall biosynthetic complex mediates the  
997 formation of stalk-specific peptidoglycan in *Caulobacter crescentus*. PLoS  
998 genetics 15, e1007897.
- 999 17. Brun, Y.V., and Shapiro, L. (1992). A temporally controlled sigma-factor is  
1000 required for polar morphogenesis and normal cell division in *Caulobacter*. Genes  
1001 Dev 6, 2395-2408.
- 1002 18. Biondi, E.G., Skerker, J.M., Arif, M., Prasol, M.S., Perchuk, B.S., and Laub, M.T.  
1003 (2006). A phosphorelay system controls stalk biogenesis during cell cycle  
1004 progression in *Caulobacter crescentus*. Mol Microbiol 59, 386-401.
- 1005 19. Schmidt, J.M., and Stanier, R.Y. (1966). The development of cellular stalks in  
1006 bacteria. J Cell Biol 28, 423-436.
- 1007 20. Gonin, M., Quardokus, E.M., O'Donnol, D., Maddock, J., and Brun, Y.V. (2000).  
1008 Regulation of stalk elongation by phosphate in *Caulobacter crescentus*. Journal  
1009 of bacteriology 182, 337-347.
- 1010 21. Curtis, P.D. (2017). Stalk formation of *Brevundimonas* and how it compares to  
1011 *Caulobacter crescentus*. PloS one 12, e0184063.
- 1012 22. Lawler, M.L., and Brun, Y.V. (2007). Advantages and mechanisms of polarity and  
1013 cell shape determination in *Caulobacter crescentus*. Curr Opin Microbiol 10, 630-  
1014 637.
- 1015 23. Thanbichler, M. (2009). Spatial regulation in *Caulobacter crescentus*. Curr Opin  
1016 Microbiol 12, 715-721.

- 1017 24. Brown, P.J., Hardy, G.G., Trimble, M.J., and Brun, Y.V. (2009). Complex  
1018 regulatory pathways coordinate cell-cycle progression and development in  
1019 *Caulobacter crescentus*. *Adv Microb Physiol* *54*, 1-101.
- 1020 25. Sundararajan, K., and Goley, E.D. (2017). Cytoskeletal Proteins in *Caulobacter*  
1021 *crescentus*: Spatial Orchestrators of Cell Cycle Progression, Development, and  
1022 Cell Shape. *Subcell Biochem* *84*, 103-137.
- 1023 26. Hughes, H.V., Huitema, E., Pritchard, S., Keiler, K.C., Brun, Y.V., and Viollier,  
1024 P.H. (2010). Protein localization and dynamics within a bacterial organelle. *Proc*  
1025 *Natl Acad Sci U S A* *107*, 5599-5604.
- 1026 27. Hughes, H.V., Lisher, J.P., Hardy, G.G., Kysela, D.T., Arnold, R.J., Giedroc,  
1027 D.P., and Brun, Y.V. (2013). Co-ordinate synthesis and protein localization in a  
1028 bacterial organelle by the action of a penicillin-binding-protein. *Mol Microbiol* *90*,  
1029 1162-1177.
- 1030 28. Vasa, S., Lin, L., Shi, C., Habenstein, B., Riedel, D., Kuhn, J., Thanbichler, M.,  
1031 and Lange, A. (2015). beta-Helical architecture of cytoskeletal bactofilin filaments  
1032 revealed by solid-state NMR. *Proc Natl Acad Sci U S A* *112*, E127-136.
- 1033 29. Karimova, G., Pidoux, J., Ullmann, A., and Ladant, D. (1998). A bacterial two-  
1034 hybrid system based on a reconstituted signal transduction pathway. *Proc Natl*  
1035 *Acad Sci U S A* *95*, 5752-5756.
- 1036 30. Perez, A.M., Mann, T.H., Lasker, K., Ahrens, D.G., Eckart, M.R., and Shapiro, L.  
1037 (2017). A Localized Complex of Two Protein Oligomers Controls the Orientation  
1038 of Cell Polarity. *mBio* *8*.
- 1039 31. Deng, X., Gonzalez Llamazares, A., Wagstaff, J.M., Hale, V.L., Cannone, G.,  
1040 McLaughlin, S.H., Kureisaite-Ciziene, D., and Lowe, J. (2019). The structure of  
1041 bactofilin filaments reveals their mode of membrane binding and lack of polarity.  
1042 *Nat Microbiol* *4*, 2357-2368.
- 1043 32. den Blaauwen, T., de Pedro, M.A., Nguyen-Disteche, M., and Ayala, J.A. (2008).  
1044 Morphogenesis of rod-shaped sacculi. *FEMS Microbiol Rev* *32*, 321-344.
- 1045 33. Kuru, E., Hughes, H.V., Brown, P.J., Hall, E., Tekkam, S., Cava, F., de Pedro,  
1046 M.A., Brun, Y.V., and VanNieuwenhze, M.S. (2012). *In Situ* probing of newly  
1047 synthesized peptidoglycan in live bacteria with fluorescent D-amino acids. *Angew*  
1048 *Chem Int Ed Engl* *51*, 12519-12523.
- 1049 34. Brown, P.J., Kysela, D.T., and Brun, Y.V. (2011). Polarity and the diversity of  
1050 growth mechanisms in bacteria. *Semin Cell Dev Biol* *22*, 790-798.
- 1051 35. Pinho, M.G., Kjos, M., and Veening, J.W. (2013). How to get (a)round:  
1052 mechanisms controlling growth and division of coccoid bacteria. *Nature reviews.*  
1053 *Microbiology* *11*, 601-614.

- 1054 36. Figge, R.M., Divakaruni, A.V., and Gober, J.W. (2004). MreB, the cell shape-  
1055 determining bacterial actin homologue, co-ordinates cell wall morphogenesis in  
1056 *Caulobacter crescentus*. *Mol Microbiol* 51, 1321-1332.
- 1057 37. Goley, E.D., Yeh, Y.C., Hong, S.H., Fero, M.J., Abeliuk, E., McAdams, H.H., and  
1058 Shapiro, L. (2011). Assembly of the *Caulobacter* cell division machine. *Mol*  
1059 *Microbiol* 80, 1680-1698.
- 1060 38. Radhakrishnan, S.K., Thanbichler, M., and Viollier, P.H. (2008). The dynamic  
1061 interplay between a cell fate determinant and a lysozyme homolog drives the  
1062 asymmetric division cycle of *Caulobacter crescentus*. *Genes Dev* 22, 212-225.
- 1063 39. Bowman, G.R., Comolli, L.R., Gaietta, G.M., Fero, M., Hong, S.H., Jones, Y.,  
1064 Lee, J.H., Downing, K.H., Ellisman, M.H., McAdams, H.H., et al. (2010).  
1065 *Caulobacter* PopZ forms a polar subdomain dictating sequential changes in pole  
1066 composition and function. *Mol Microbiol* 76, 173-189.
- 1067 40. Dahlberg, P.D., Saurabh, S., Sartor, A.M., Wang, J., Mitchell, P.G., Chiu, W.,  
1068 Shapiro, L., and Moerner, W.E. (2020). Cryogenic single-molecule fluorescence  
1069 annotations for electron tomography reveal in situ organization of key proteins in  
1070 *Caulobacter*. *Proc Natl Acad Sci U S A*.
- 1071 41. Wali, T.M., Hudson, G.R., Danald, D.A., and Weiner, R.M. (1980). Timing of  
1072 swarmer cell cycle morphogenesis and macromolecular synthesis by  
1073 *Hyphomicrobium neptunium* in synchronous culture. *Journal of bacteriology* 144,  
1074 406-412.
- 1075 42. Moore, R.L. (1981). The biology of *Hyphomicrobium* and other prosthecate,  
1076 budding bacteria. *Annu Rev Microbiol* 35, 567-594.
- 1077 43. Zerfas, P.M., Kessel, M., Quintero, E.J., and Weiner, R.M. (1997). Fine-structure  
1078 evidence for cell membrane partitioning of the nucleoid and cytoplasm during bud  
1079 formation in *Hyphomonas* species. *Journal of bacteriology* 179, 148-156.
- 1080 44. Cserti, E., Roskopf, S., Chang, Y.W., Eisehauer, S., Selter, L., Shi, J., Regh, C.,  
1081 Koert, U., Jensen, G.J., and Thanbichler, M. (2017). Dynamics of the  
1082 peptidoglycan biosynthetic machinery in the stalked budding bacterium  
1083 *Hyphomonas neptunium*. *Mol Microbiol* 103, 875-895.
- 1084 45. Taylor, J.A., Bratton, B.P., Sichel, S.R., Blair, K.M., Jacobs, H.M., DeMeester,  
1085 K.E., Kuru, E., Gray, J., Biboy, J., VanNieuwenhze, M.S., et al. (2019). Distinct  
1086 cytoskeletal proteins define zones of enhanced cell wall synthesis in *Helicobacter*  
1087 *pylori*. *bioRxiv*.
- 1088 46. Meniche, X., Otten, R., Siegrist, M.S., Baer, C.E., Murphy, K.C., Bertozzi, C.R.,  
1089 and Sasseti, C.M. (2014). Subpolar addition of new cell wall is directed by  
1090 DivIVA in mycobacteria. *Proc Natl Acad Sci U S A* 111, E3243-3251.

- 1091 47. Melzer, E.S., Sein, C.E., Chambers, J.J., and Sloan Siegrist, M. (2018). DivIVA  
1092 concentrates mycobacterial cell envelope assembly for initiation and stabilization  
1093 of polar growth. *Cytoskeleton (Hoboken)* 75, 498-507.
- 1094 48. Kysela, D.T., Randich, A.M., Caccamo, P.D., and Brun, Y.V. (2016). Diversity  
1095 Takes Shape: Understanding the Mechanistic and Adaptive Basis of Bacterial  
1096 Morphology. *PLoS Biol* 14, e1002565.
- 1097 49. Taylor, J.A., Sichel, S.R., and Salama, N.R. (2019). Bent Bacteria: A Comparison  
1098 of Cell Shape Mechanisms in Proteobacteria. *Annu Rev Microbiol* 73, 457-480.
- 1099 50. Waterhouse, A., Bertoni, M., Bienert, S., Studer, G., Tauriello, G., Gumienny, R.,  
1100 Heer, F.T., de Beer, T.A.P., Rempfer, C., Bordoli, L., et al. (2018). SWISS-  
1101 MODEL: homology modelling of protein structures and complexes. *Nucleic acids  
1102 research* 46, W296-W303.
- 1103 51. Shi, C., Fricke, P., Lin, L., Chevelkov, V., Wegstroth, M., Giller, K., Becker, S.,  
1104 Thanbichler, M., and Lange, A. (2015). Atomic-resolution structure of cytoskeletal  
1105 bactofilin by solid-state NMR. *Sci Adv* 1, e1501087.
- 1106 52. McGill, R., Tukey, J.W., and Larsen, W.A. (1978). Variations of Box Plots. *Am  
1107 Stat* 32, 12-16.
- 1108 53. Hintze, J.L., and Nelson, R.D. (1998). Violin Plots: A Box Plot-Density Trace  
1109 Synergism. *The American Statistician* 52, 181-184.
- 1110 54. Poindexter, J.S. (1978). Selection for nonbuoyant morphological mutants of  
1111 *Caulobacter crescentus*. *Journal of bacteriology* 135, 1141-1145.
- 1112 55. Dower, W.J., Miller, J.F., and Ragsdale, C.W. (1988). High efficiency  
1113 transformation of *E. coli* by high voltage electroporation. *Nucleic acids research*  
1114 16, 6127-6145.
- 1115 56. Chung, C.T., Niemela, S.L., and Miller, R.H. (1989). One-step preparation of  
1116 competent *Escherichia coli*: transformation and storage of bacterial cells in the  
1117 same solution. *Proc Natl Acad Sci U S A* 86, 2172-2175.
- 1118 57. Chung, C.T., and Miller, R.H. (1993). Preparation and storage of competent  
1119 *Escherichia coli* cells. *Methods Enzymol* 218, 621-627.
- 1120 58. Saltikov, C.W., and Newman, D.K. (2003). Genetic identification of a respiratory  
1121 arsenate reductase. *Proc Natl Acad Sci U S A* 100, 10983-10988.
- 1122 59. Thanbichler, M., Iniesta, A.A., and Shapiro, L. (2007). A comprehensive set of  
1123 plasmids for vanillate- and xylose-inducible gene expression in *Caulobacter  
1124 crescentus*. *Nucleic acids research* 35, e137.

- 1125 60. Chen, I.A., Chu, K., Palaniappan, K., Pillay, M., Ratner, A., Huang, J.,  
1126 Huntemann, M., Varghese, N., White, J.R., Seshadri, R., et al. (2019). IMG/M  
1127 v.5.0: an integrated data management and comparative analysis system for  
1128 microbial genomes and microbiomes. *Nucleic acids research* 47, D666-D677.
- 1129 61. Waterhouse, A.M., Procter, J.B., Martin, D.M., Clamp, M., and Barton, G.J.  
1130 (2009). Jalview Version 2--a multiple sequence alignment editor and analysis  
1131 workbench. *Bioinformatics* 25, 1189-1191.
- 1132 62. Robert, X., and Gouet, P. (2014). Deciphering key features in protein structures  
1133 with the new ENDscript server. *Nucleic acids research* 42, W320-324.
- 1134 63. Raghava, G.P., and Barton, G.J. (2006). Quantification of the variation in  
1135 percentage identity for protein sequence alignments. *BMC Bioinformatics* 7, 415.
- 1136 64. Schindelin, J., Arganda-Carreras, I., Frise, E., Kaynig, V., Longair, M., Pietzsch,  
1137 T., Preibisch, S., Rueden, C., Saalfeld, S., Schmid, B., et al. (2012). Fiji: an open-  
1138 source platform for biological-image analysis. *Nat Methods* 9, 676-682.
- 1139 65. Ducret, A., Quardokus, E.M., and Brun, Y.V. (2016). MicrobeJ, a tool for high  
1140 throughput bacterial cell detection and quantitative analysis. *Nat Microbiol* 1,  
1141 16077.
- 1142 66. Tinevez, J.Y., Perry, N., Schindelin, J., Hoopes, G.M., Reynolds, G.D.,  
1143 Laplantine, E., Bednarek, S.Y., Shorte, S.L., and Eliceiri, K.W. (2017).  
1144 TrackMate: An open and extensible platform for single-particle tracking. *Methods*  
1145 115, 80-90.
- 1146 67. R Development Core Team (2012). R: a language and environment for statistical  
1147 computing. (Vienna, Austria: The R Foundation for Statistical Computing).
- 1148 68. Wickham, H. (2016). *ggplot2: Elegant Graphics for Data Analysis*. (New York:  
1149 Springer-Verlag).
- 1150 69. Ahlmann-Eltze, C. (2019). *ggsignif: Significance Brackets for 'ggplot2'*. 0.5.0  
1151 Edition.
- 1152 70. Pate, J.L., and Ordal, E.J. (1965). The fine structure of two unusual stalked  
1153 bacteria. *J Cell Biol* 27, 133-150.
- 1154

## KEY RESOURCES TABLE

| REAGENT or RESOURCE                                                            | SOURCE                                                                                                     | IDENTIFIER                                                                                                                                |
|--------------------------------------------------------------------------------|------------------------------------------------------------------------------------------------------------|-------------------------------------------------------------------------------------------------------------------------------------------|
| <b>Antibodies</b>                                                              |                                                                                                            |                                                                                                                                           |
| Anti-GFP (Green Fluorescent Protein) pAb                                       | MBL International                                                                                          | Cat#598;<br>RRID:AB_591819                                                                                                                |
| Goat Anti-rabbit HRP                                                           | Pierce                                                                                                     | Cat#1858415                                                                                                                               |
| <b>Bacterial and Virus Strains</b>                                             |                                                                                                            |                                                                                                                                           |
| <i>E. coli</i> : Alpha-Select Silver                                           | Bioline                                                                                                    | Cat#BIO-85026                                                                                                                             |
| <i>E. coli</i> : BL21(DE3)                                                     | Novagen                                                                                                    | Cat#69387-3                                                                                                                               |
| <i>E. coli</i> : XL1-Blue                                                      | Stratagene                                                                                                 | Cat#200249                                                                                                                                |
| <i>E. coli</i> : BTH101                                                        | EuroMedex                                                                                                  | Cat#EUB001                                                                                                                                |
| <i>E. coli</i> : DAP (diaminopimelic acid) auxotroph used for conjugation      | W. Metcalf, Univ. of Illinois, Urbana [58]                                                                 | WM3064                                                                                                                                    |
| <i>Asticcacaulis biprosthicum</i> C19                                          | [70]                                                                                                       | ATCC: 27554                                                                                                                               |
| Mutant strains, see <b>Table S3</b>                                            |                                                                                                            |                                                                                                                                           |
| <b>Deposited Data</b>                                                          |                                                                                                            |                                                                                                                                           |
| <i>C. crescentus</i> <i>bacA</i> /BacA gene and protein sequences              | Integrated Microbial Genomes:<br><a href="https://img.jgi.doe.gov">https://img.jgi.doe.gov</a>             | Genome Name:<br><i>Caulobacter crescentus</i> CB15;<br>Genome ID:<br>637000061;<br>Gene ID:<br>637087916;<br>Amino acids: 161             |
| <i>C. crescentus</i> <i>bacB</i> /BacB gene and protein sequences              | Integrated Microbial Genomes:<br><a href="https://img.jgi.doe.gov">https://img.jgi.doe.gov</a><br>and [12] | Genome Name:<br><i>Caulobacter crescentus</i> CB15;<br>Genome ID:<br>637000061;<br>Gene ID:<br>637089074;<br>Amino acids: 180             |
| <i>Asticcacaulis biprosthicum</i> <i>bacA</i> /BacA gene and protein sequences | Integrated Microbial Genomes:<br><a href="https://img.jgi.doe.gov">https://img.jgi.doe.gov</a>             | Genome Name:<br><i>Asticcacaulis biprosthicum</i> C19,<br>ATCC 27554<br>Genome ID:<br>651285000<br>Gene ID: 651319016<br>Amino acids: 181 |
| Structural coordinates of <i>C. crescentus</i> BacA                            | [51]                                                                                                       | PBD 2N3D                                                                                                                                  |
| <b>Oligonucleotides</b>                                                        |                                                                                                            |                                                                                                                                           |
| Primers for construct generation and sequencing, see <b>Table S4</b>           | Eurofins                                                                                                   | N/A                                                                                                                                       |
| <b>Recombinant DNA</b>                                                         |                                                                                                            |                                                                                                                                           |
| pMR10                                                                          | R. Roberts and C. Mohr                                                                                     | N/A                                                                                                                                       |
| pNPTS138                                                                       | M.R.K. Alley                                                                                               | N/A                                                                                                                                       |
| pNPTS139                                                                       | M.R.K. Alley                                                                                               | N/A                                                                                                                                       |
| pGFPC-1                                                                        | [59]                                                                                                       | N/A                                                                                                                                       |
| pVENC-4                                                                        | [59]                                                                                                       | N/A                                                                                                                                       |

|                                     |           |                                                                                                       |
|-------------------------------------|-----------|-------------------------------------------------------------------------------------------------------|
| pKT25                               | EuroMedex | Cat#EUP-25C                                                                                           |
| pKNT25                              | EuroMedex | Cat#EUP-25N                                                                                           |
| pUT18                               | EuroMedex | Cat#EUP-18N                                                                                           |
| pUT18C                              | EuroMedex | Cat#EUP-18C                                                                                           |
| pKT25-zip                           | EuroMedex | Cat#EUP-25Z                                                                                           |
| pUT18C-zip                          | EuroMedex | Cat#EUP-18Z                                                                                           |
| pET28a+                             | Novagen   | Cat#69864                                                                                             |
| Cloned vectors, see <b>Table S2</b> |           |                                                                                                       |
| Software and Algorithms             |           |                                                                                                       |
| Jalview                             | [61]      | <a href="https://www.jalview.org/">https://www.jalview.org/</a>                                       |
| SWISS-MODEL                         | [50]      | <a href="https://swissmodel.expasy.org/">https://swissmodel.expasy.org/</a>                           |
| ESPrpt                              | [62]      | <a href="http://esprpt.ibcp.fr/ESPrpt/ESPrpt/">http://esprpt.ibcp.fr/ESPrpt/ESPrpt/</a>               |
| FIJI                                | [64]      | <a href="https://fiji.sc/">https://fiji.sc/</a>                                                       |
| MicrobeJ                            | [65]      | <a href="https://www.microbej.com/">https://www.microbej.com/</a>                                     |
| TrackMate                           | [66]      | <a href="https://imagej.net/TrackMate">https://imagej.net/TrackMate</a>                               |
| R                                   | [67]      | <a href="https://www.r-project.org/">https://www.r-project.org/</a>                                   |
| ggplot2                             | [68]      | <a href="https://cran.r-project.org/package=ggplot2">https://cran.r-project.org/package=ggplot2</a>   |
| ggsignif                            | [69]      | <a href="https://cran.r-project.org/package=ggsignif">https://cran.r-project.org/package=ggsignif</a> |



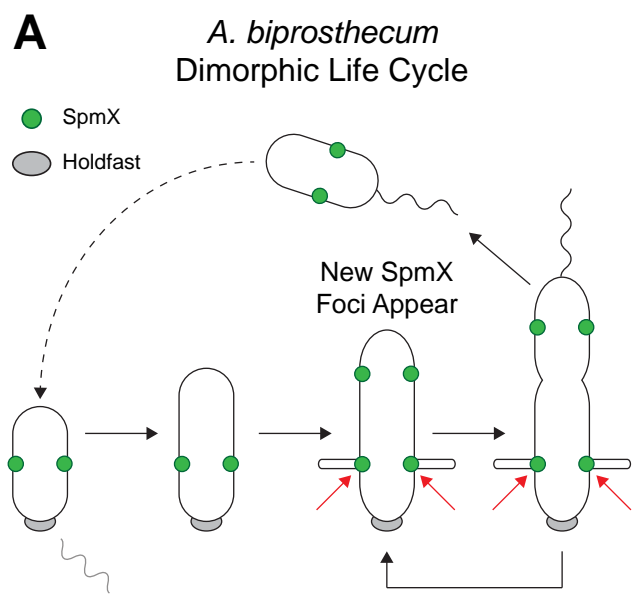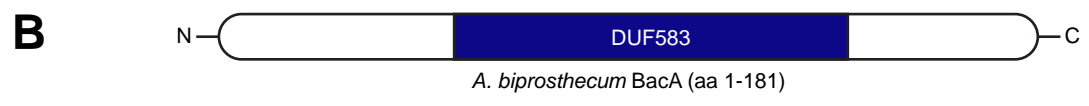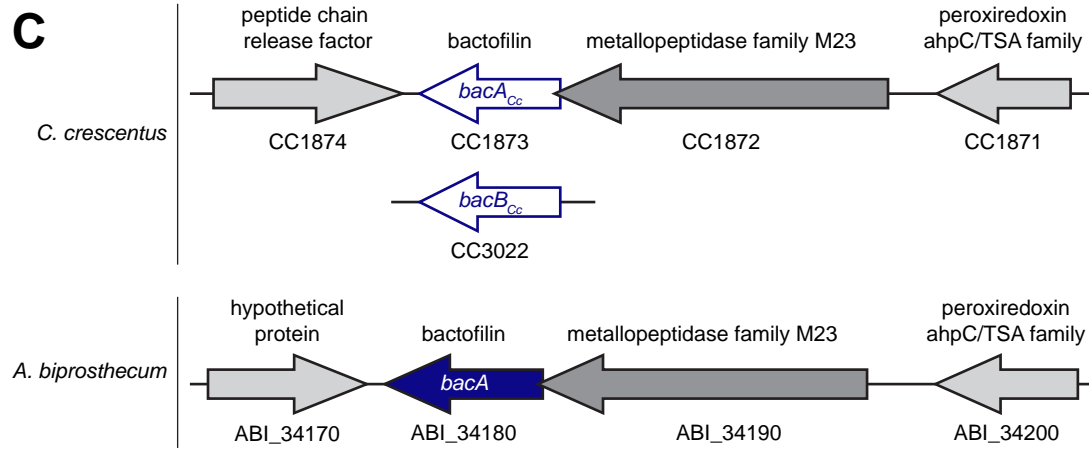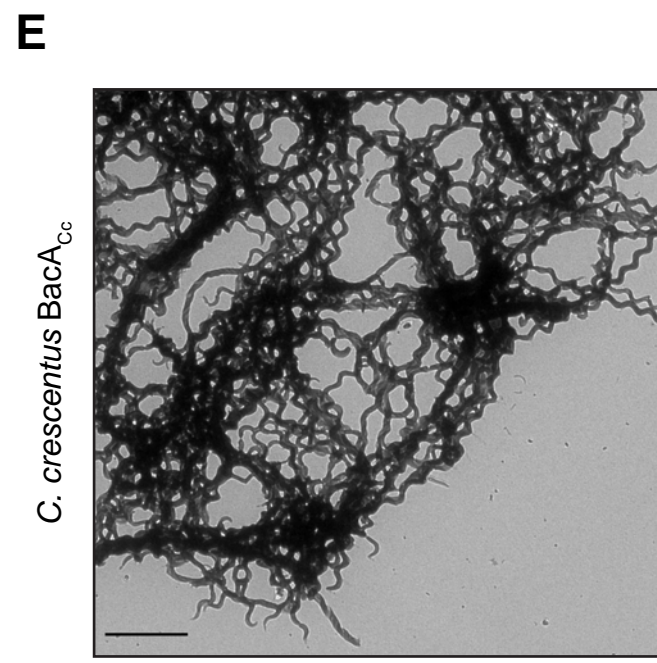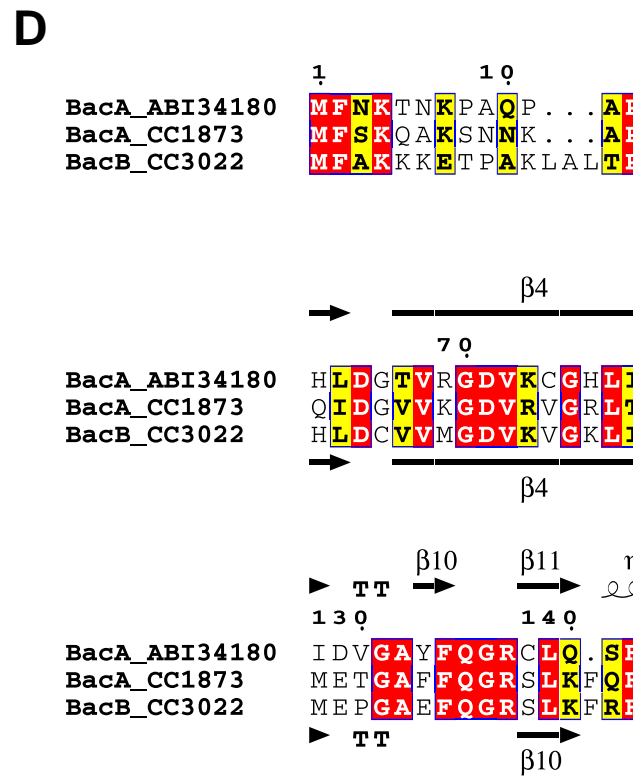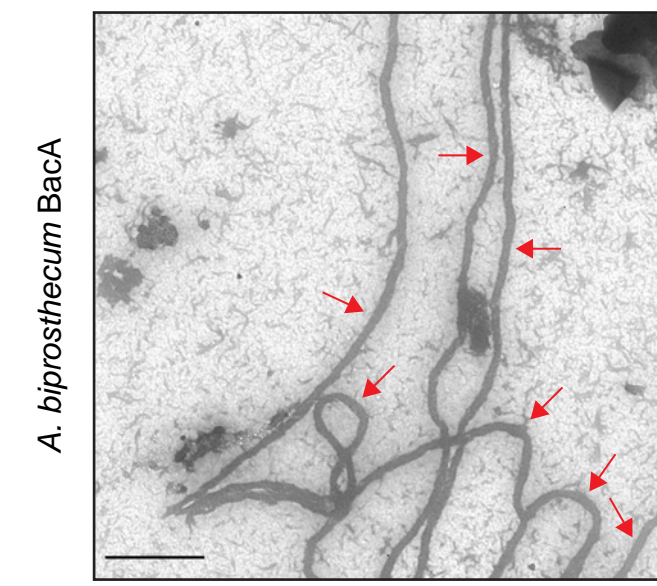

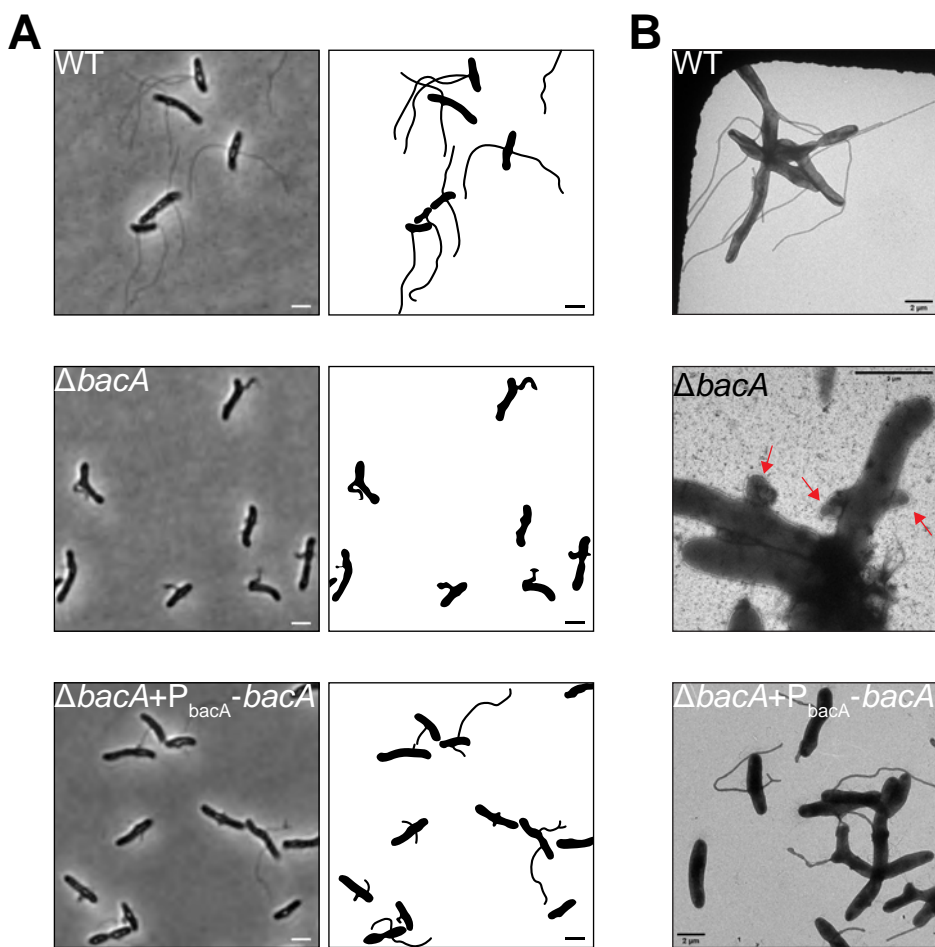

**C**

| Strain                                                | Stalk/Pseudostalk Diameter (nm) | Stalk/Pseudostalk Length ( $\mu\text{m}$ ) | % Cells with WT Stalks |
|-------------------------------------------------------|---------------------------------|--------------------------------------------|------------------------|
| WT                                                    | $171 \pm 13$                    | $7.3 \pm 3.7$                              | $58\% \pm 12$          |
| WT+EV                                                 | $170 \pm 12$                    | $8.2 \pm 5.1$                              | $52\% \pm 13$          |
| $\Delta bacA$                                         | $392 \pm 73$                    | $0.9 \pm 0.5$                              | $3\% \pm 2$            |
| $\Delta bacA$ +EV                                     | $392 \pm 55$                    | $0.8 \pm 0.4$                              | $3\% \pm 1$            |
| $\Delta bacA$ +P <sub><i>bacA</i></sub> - <i>bacA</i> | $178 \pm 20$                    | $2.4 \pm 2.0$                              | $28\% \pm 6$           |

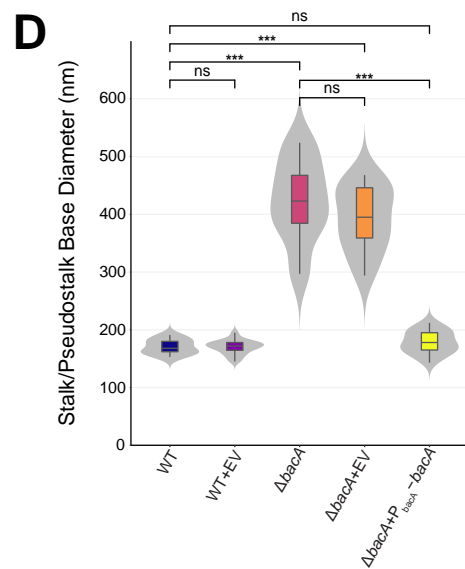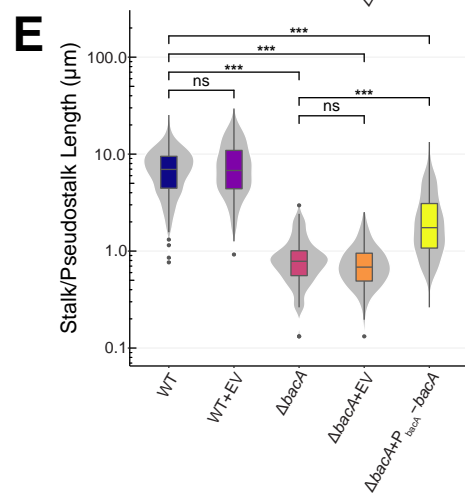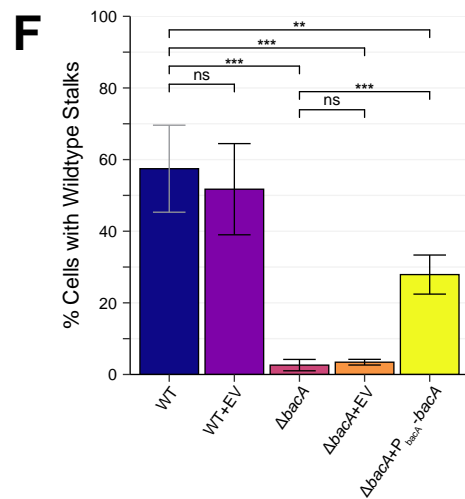

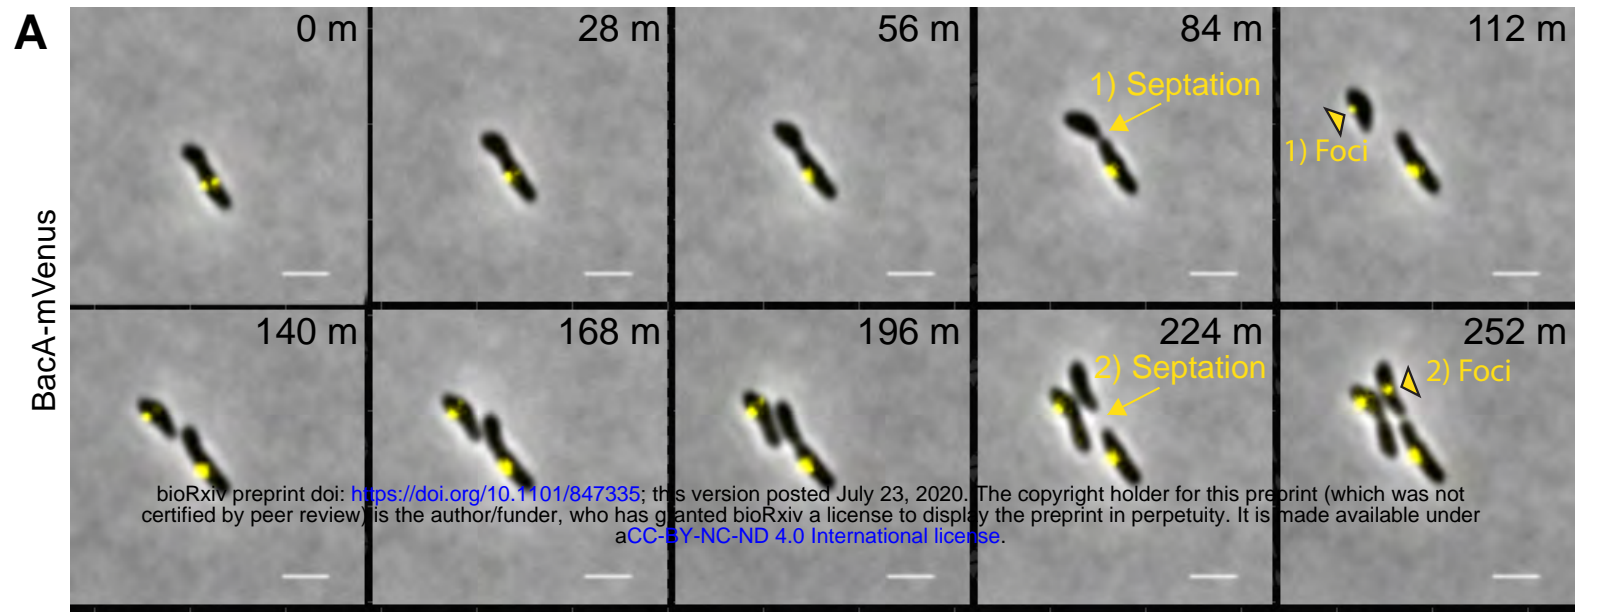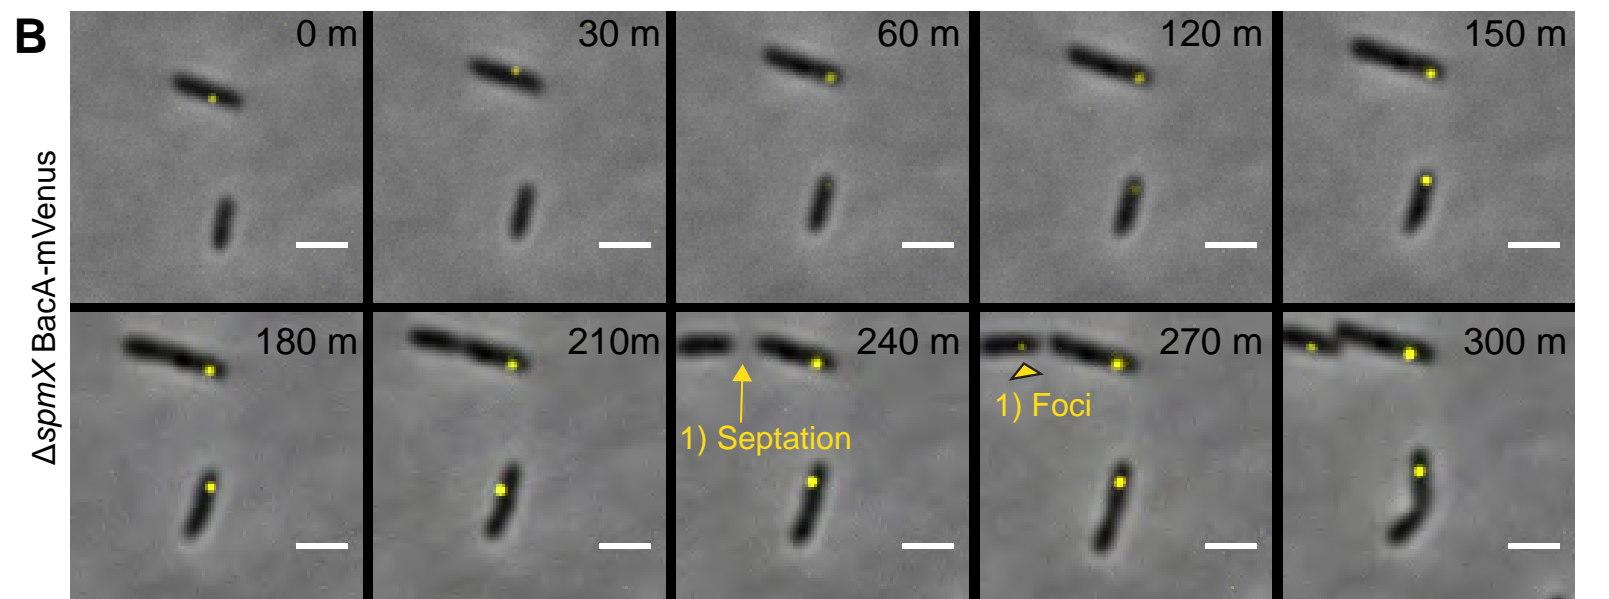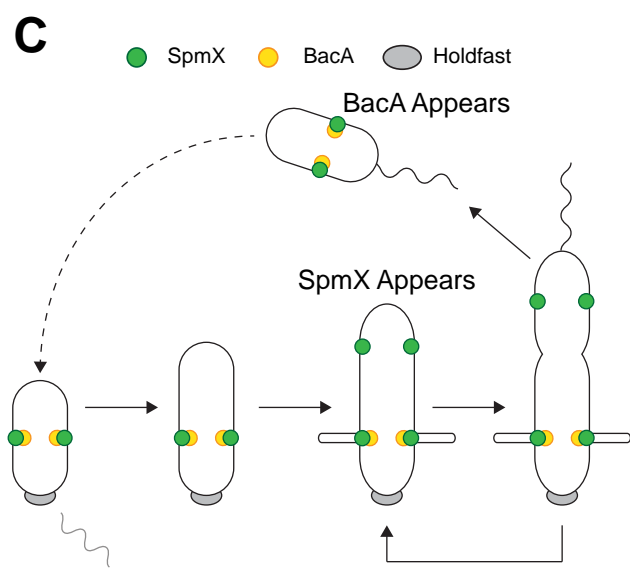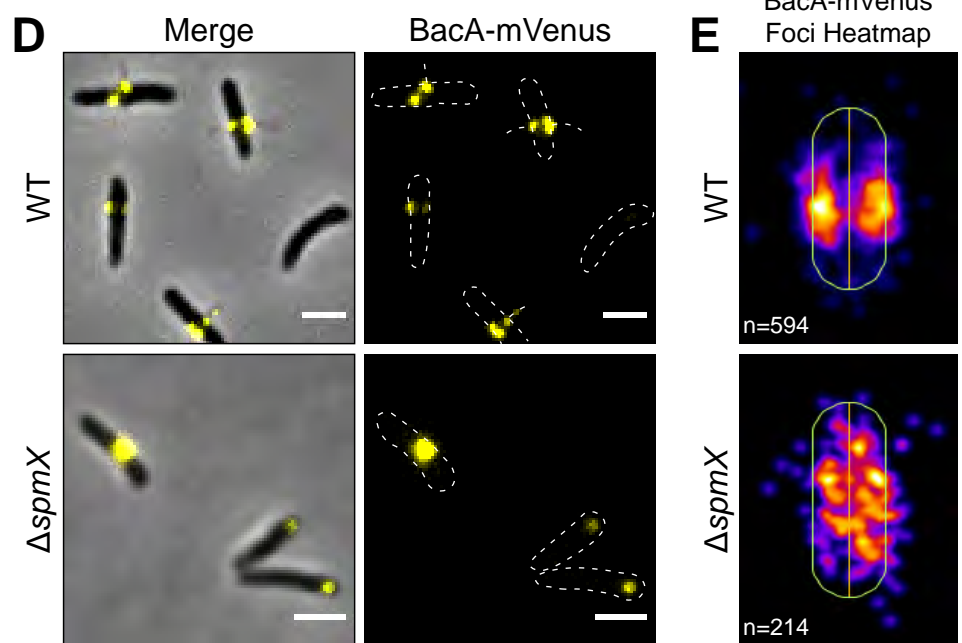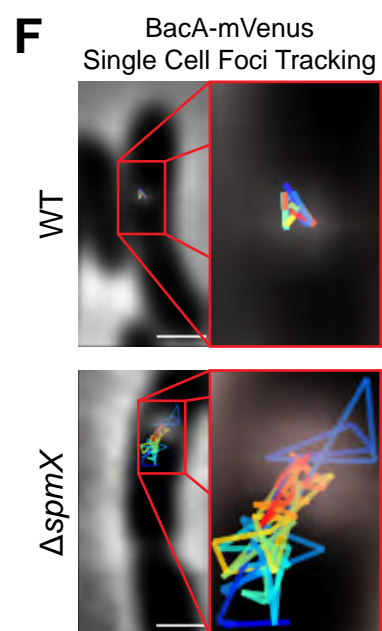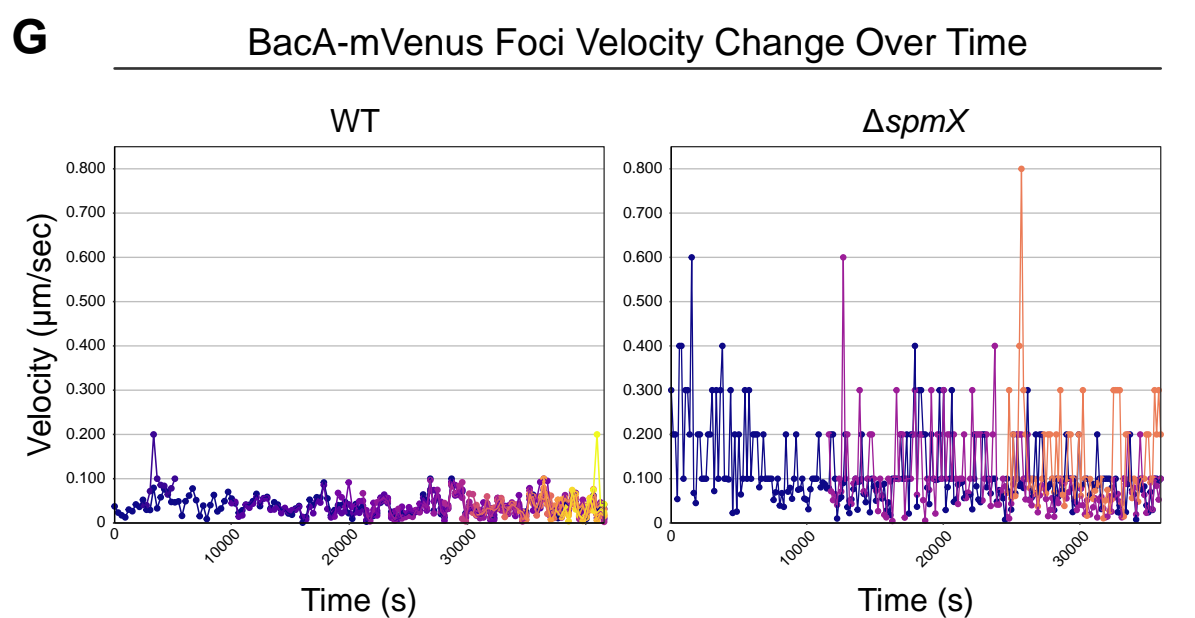

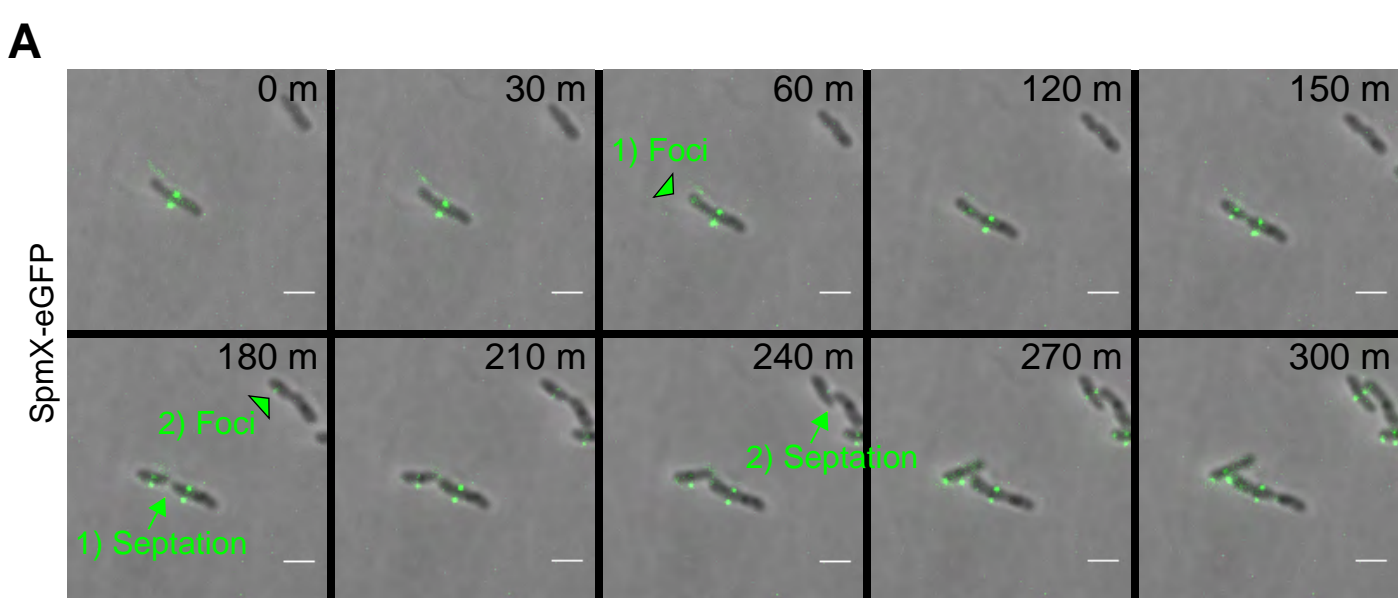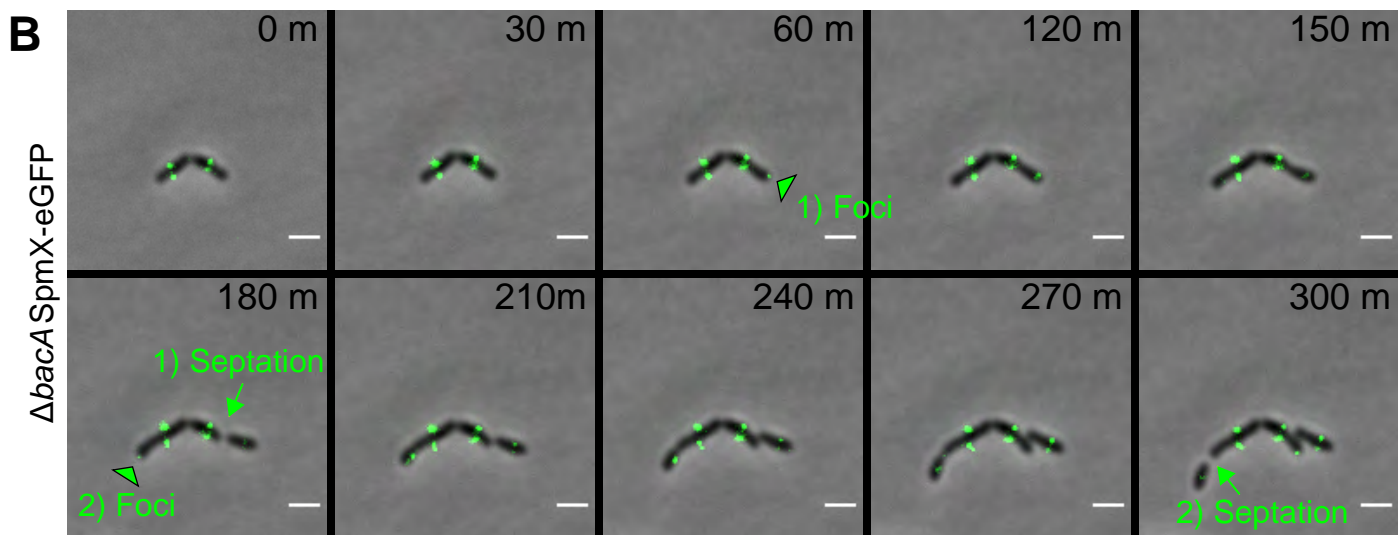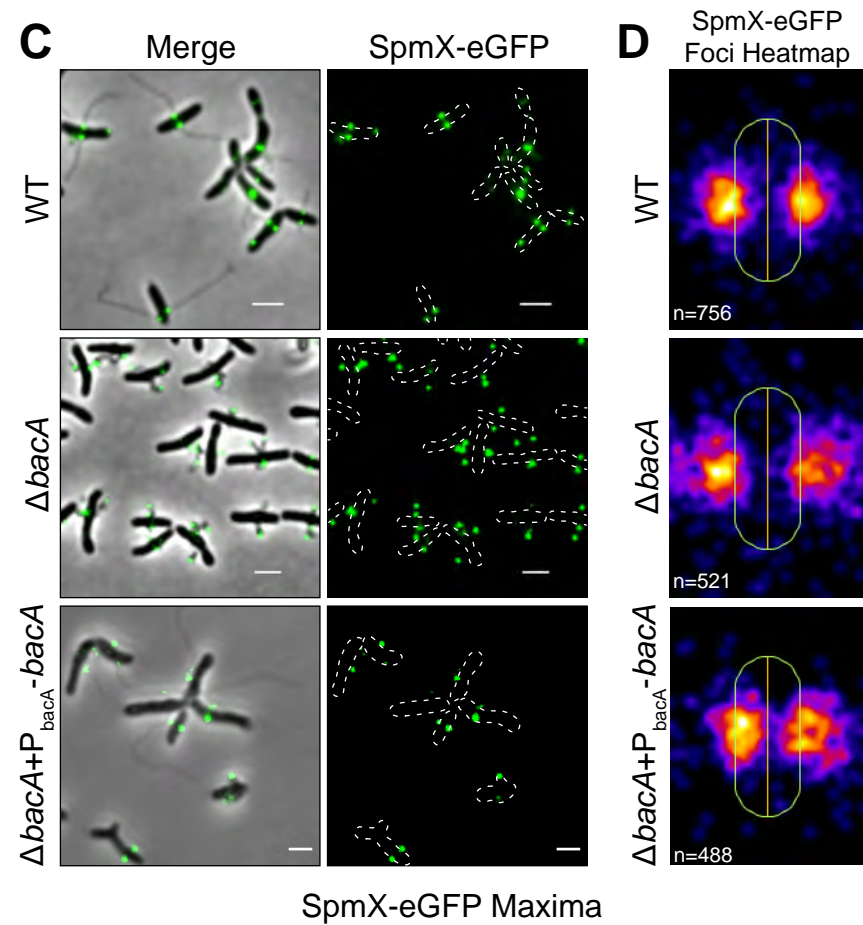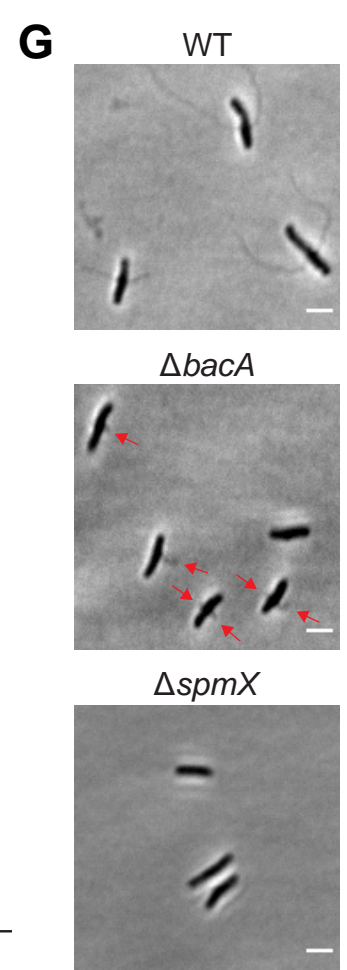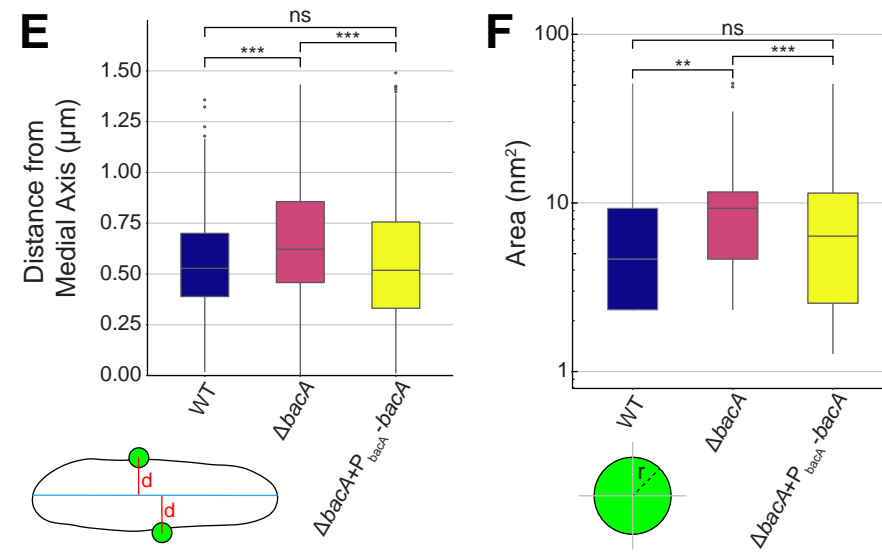

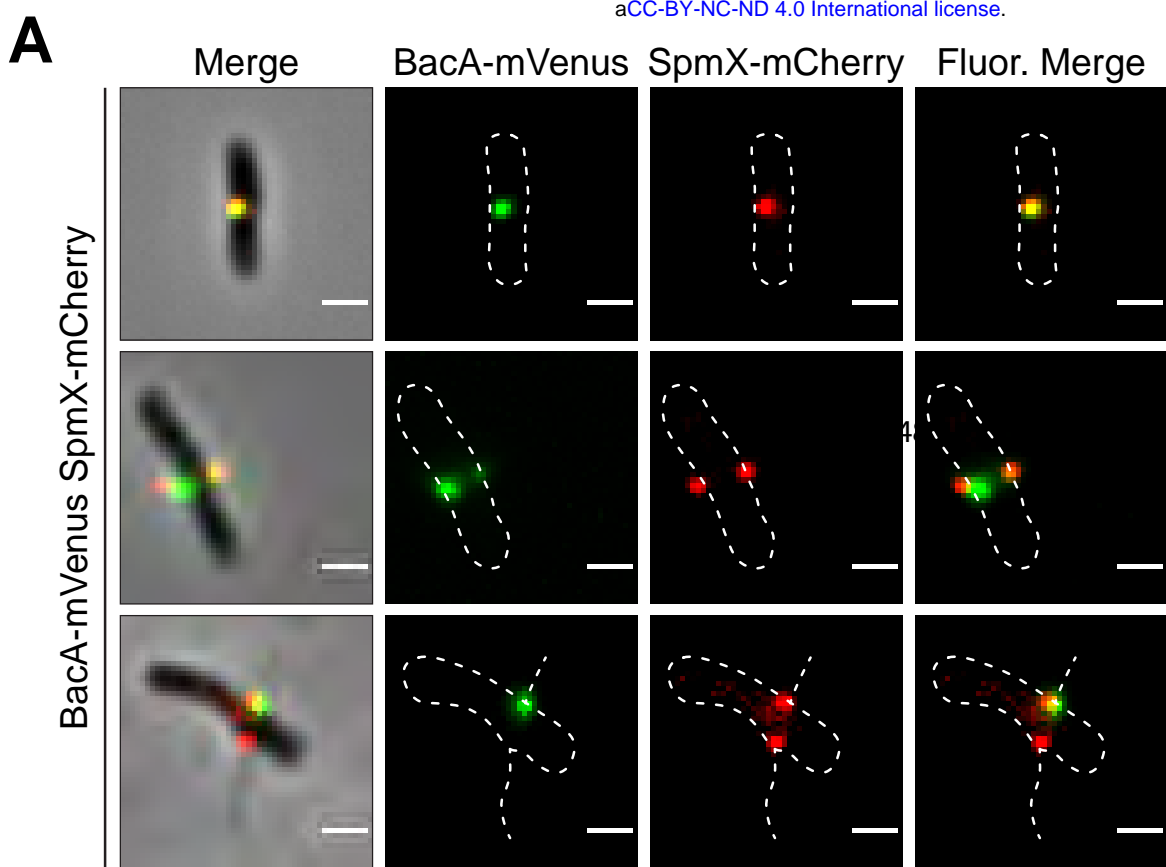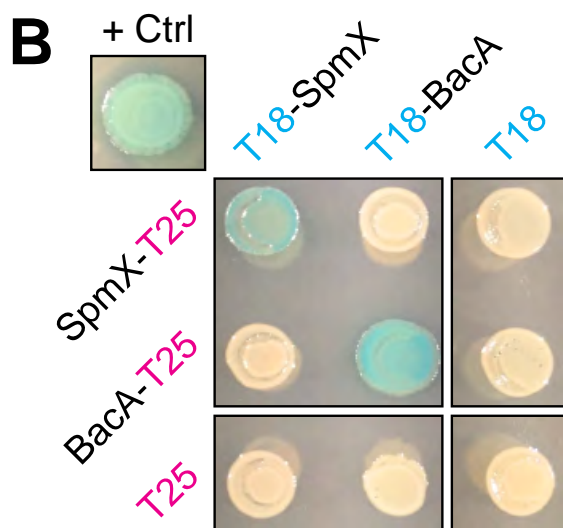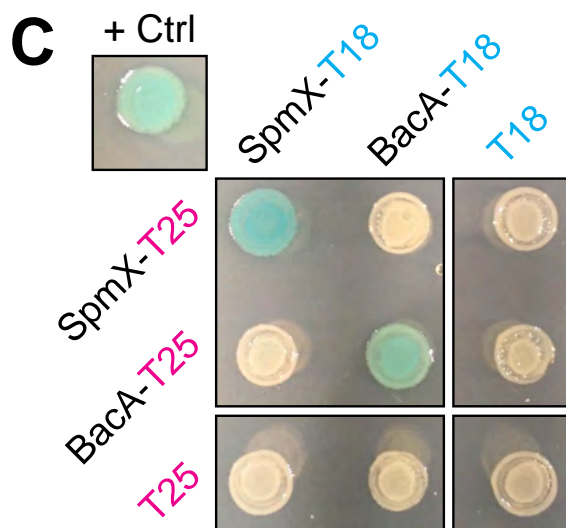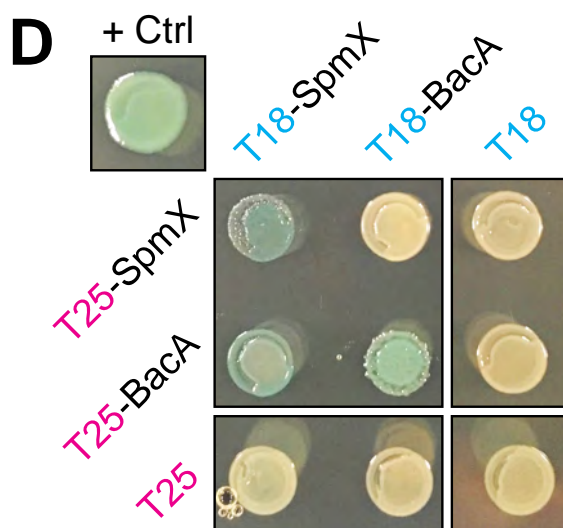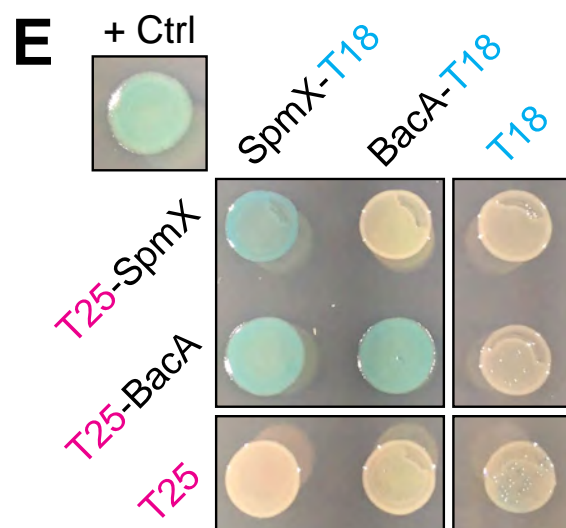

**A**

bioRxiv preprint doi: <https://doi.org/10.1101/847335>; this version posted July 23, 2020. The copyright holder for this preprint (which was not certified by peer review) is the author/funder, who has granted bioRxiv a license to display the preprint in perpetuity. It is made available under aCC-BY-NC-ND 4.0 International license.

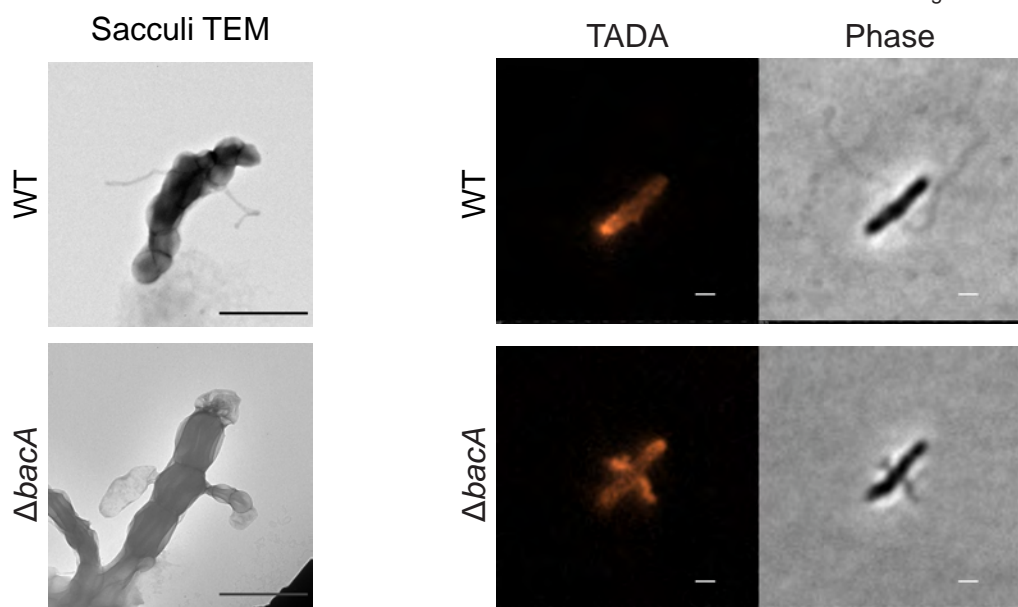**C**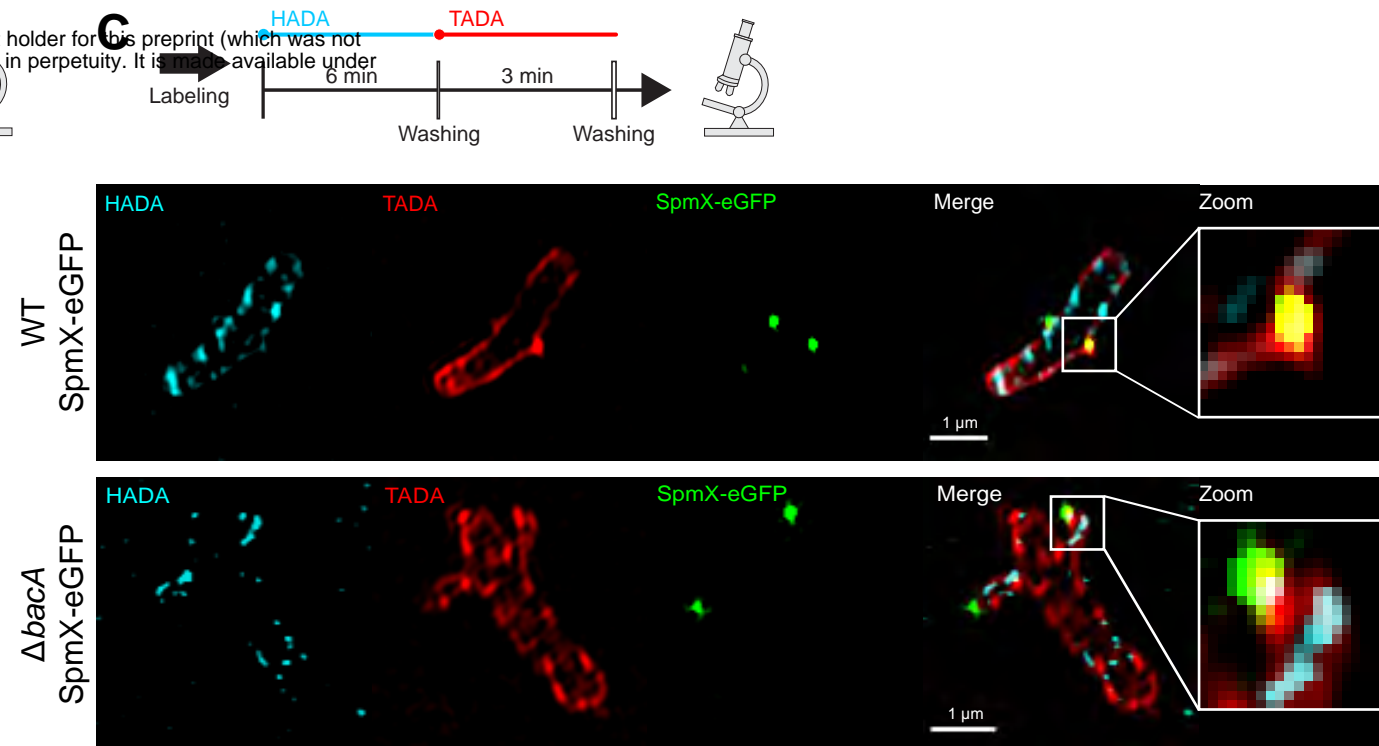**D**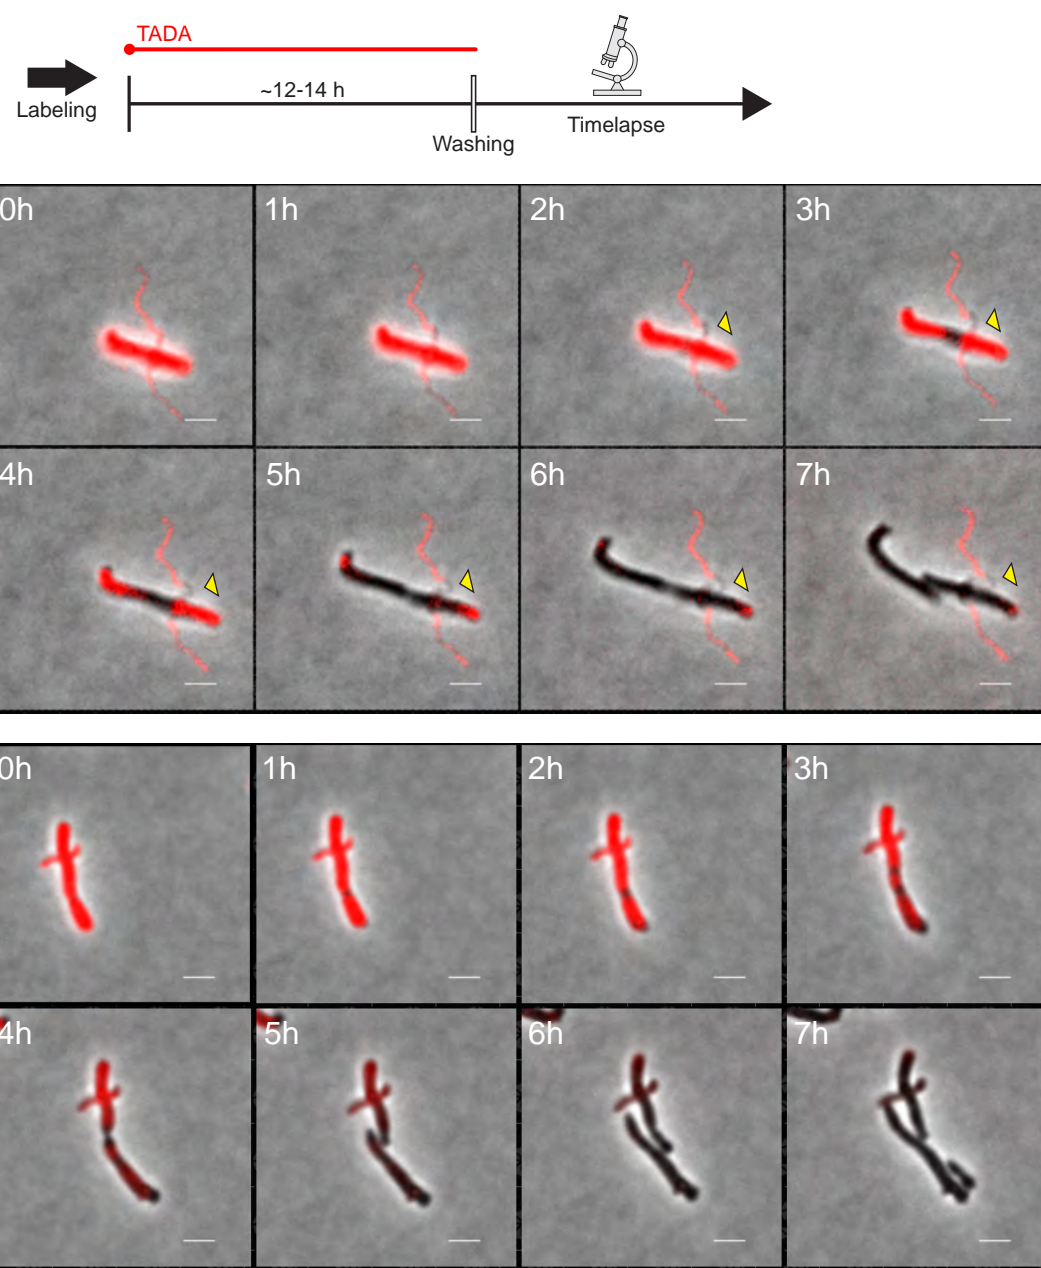**E**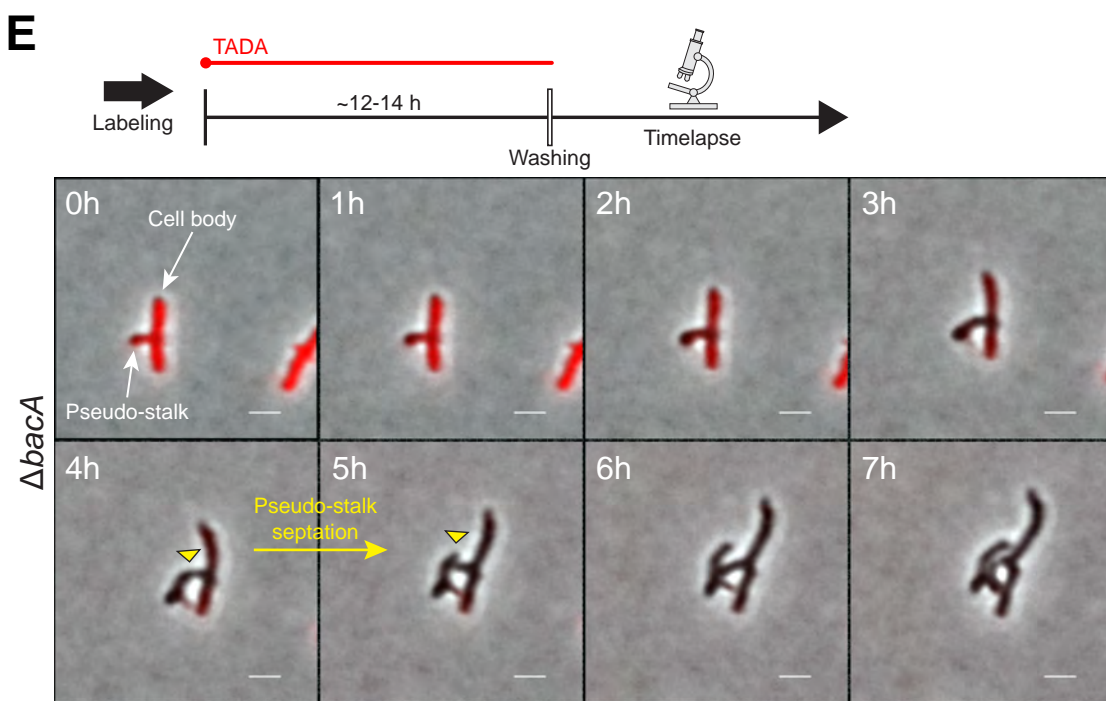**F**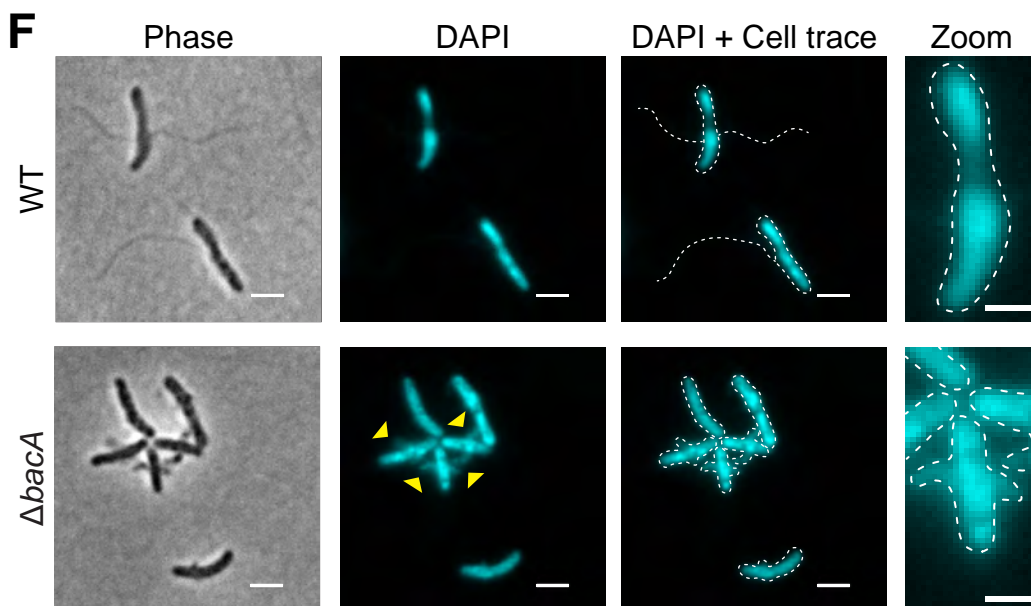

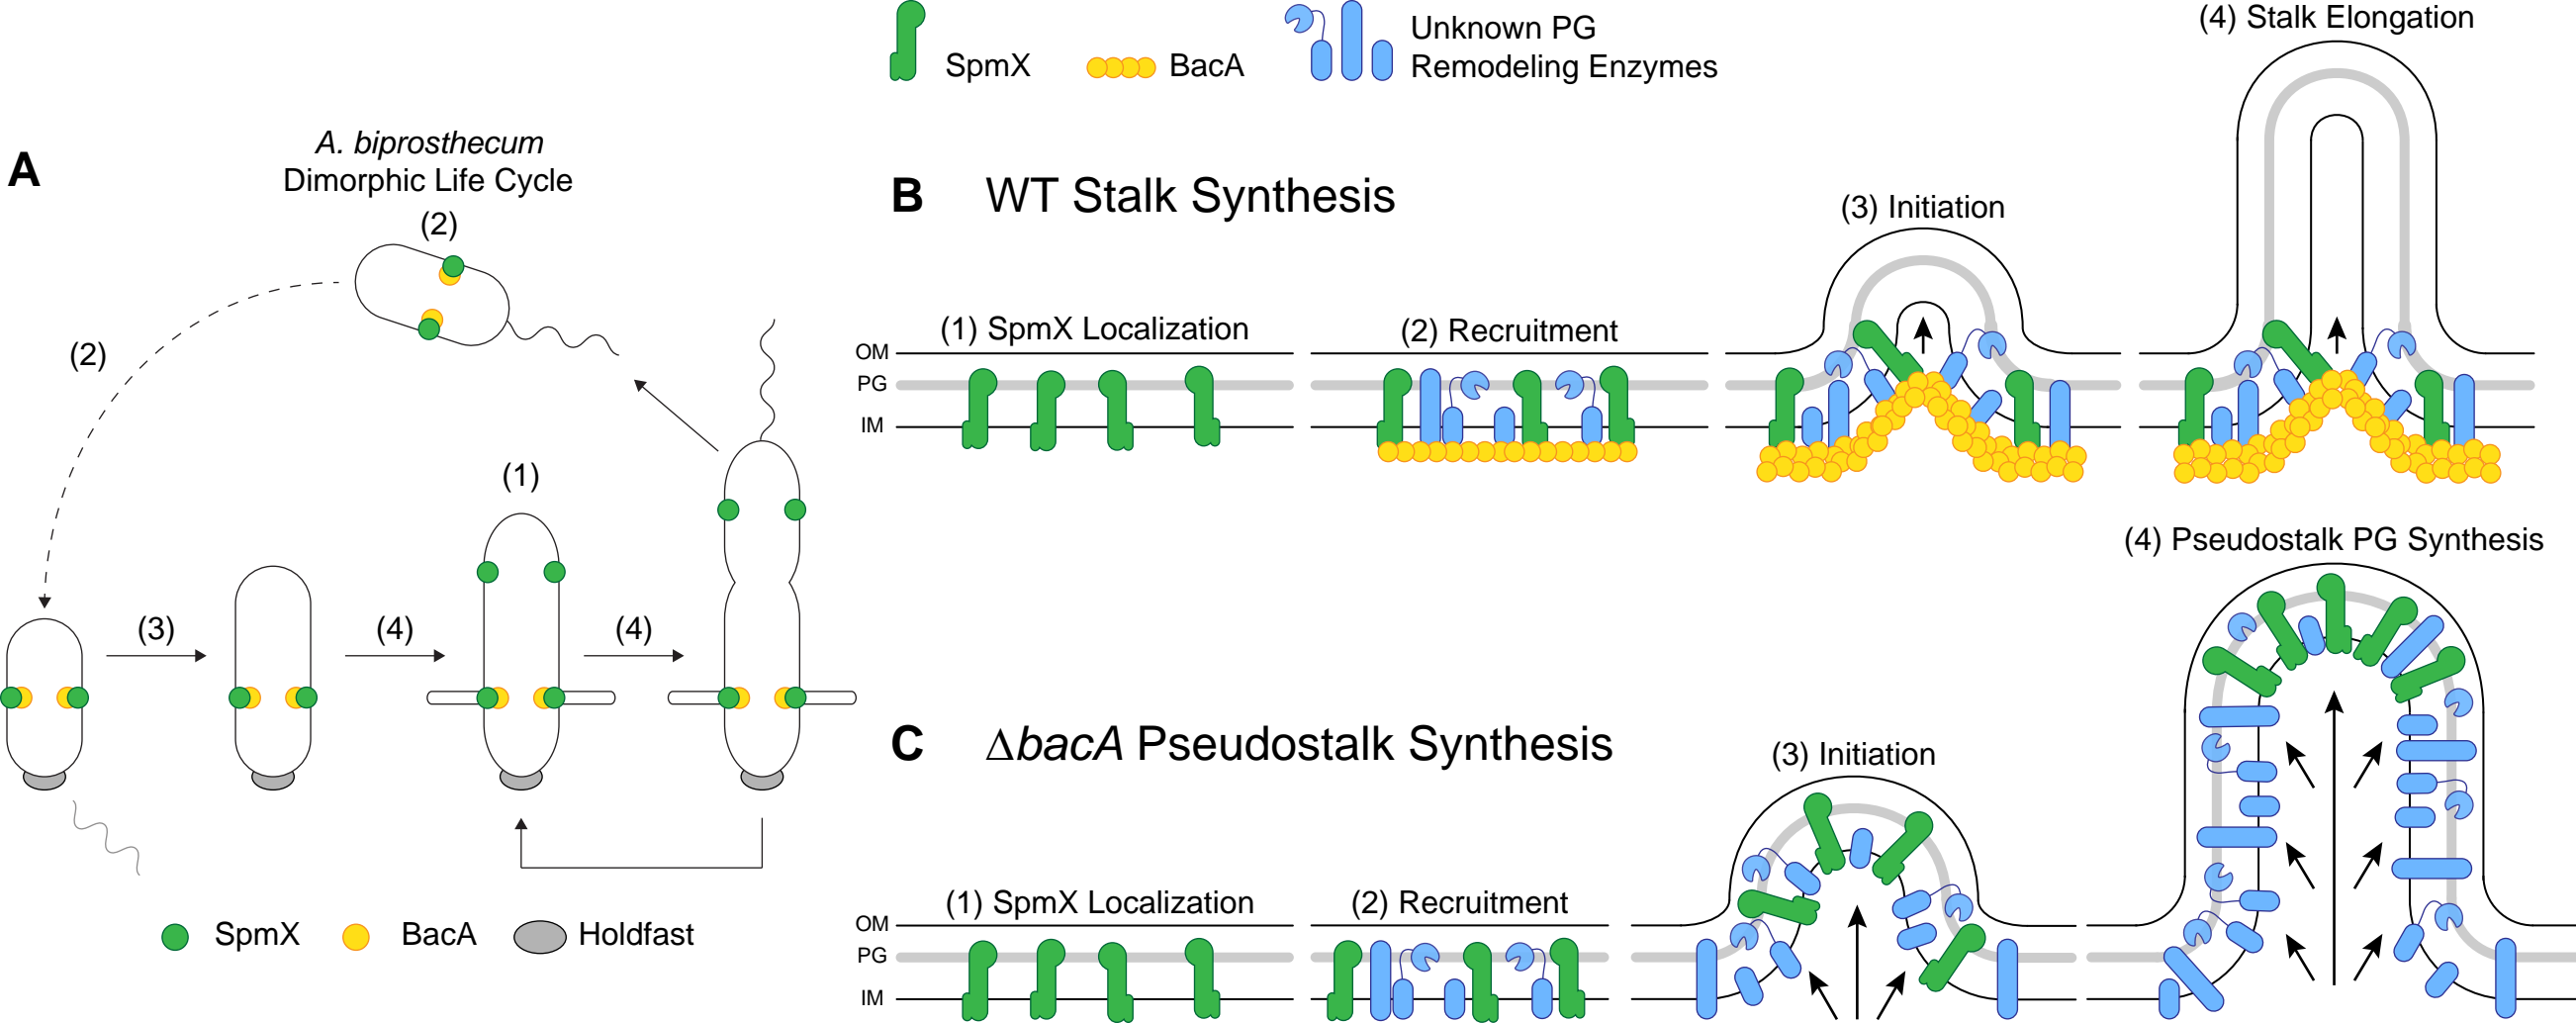

Source: https://www.biorxiv.org/content/10.1101/847335v3.full.pdf
